# Supplementary material
Source: PubMed Central journal article supplement (PMC5313407)
Supplement: 12298_2016_403_MOESM1_ESM.pdf [file 12298_2016_403_MOESM1_ESM.pdf]

**Table S1** The pedigree of 92 sugarcane varieties that were used in present study

| Sl. No. | Variety  | Pedigree                | Sl. No. | Variety  | Pedigree           |
|---------|----------|-------------------------|---------|----------|--------------------|
| 1       | BO109    | Co 1193 × BO 32         | 47      | CoS02258 | Co 1158 GC         |
| 2       | BO110    | Co 1193 × BO 50         | 48      | CoS02264 | Co 1148 PC         |
| 3       | BO120    | BO 91 × BO 43           | 49      | CoS03279 | CoH 76 PC          |
| 4       | BO128    | BO 85 × BO 43           | 50      | CoS109   | Co 290 × Co 281    |
| 5       | BO129    | B0 85 × BO 43           | 51      | CoS245   | Co 421 × Co 313    |
| 6       | BO130    | BO 91 × BO 43           | 52      | CoS443   | Co 527 × Co 453    |
| 7       | BO136    | BO 89PC                 | 53      | CoS510   |                    |
| 8       | BO137    | BO 106 FC               | 54      | CoS514   | Co 419 × Co 285    |
| 9       | BO138    | Co 9701 × Co 1148       | 55      | CoS541   | Co 419 × Co 285    |
| 10      | BO91     | BO 55 x BO 43           | 56      | CoS687   |                    |
| 11      | BO99     | Co 1207 × BO 43         | 57      | CoS767   | Co 419 × Co 313    |
| 12      | Co1148   | P 4383 × Co 301         | 58      | CoS770   | Co 1158 × CoS 510  |
| 13      | Co1158   | Co 421 GC               | 59      | CoS797   | Co 1148 × Co 775   |
| 14      | Co1336   | Co 1139 × G 2866        | 60      | CoS8207  | Co 617 × BO 47     |
| 15      | Co419    | PoJ 2728 × Co 290       | 61      | CoS8315  | Co 1148 GC         |
| 16      | Co453    | Zwart Cheribon × Co 285 | 62      | CoS8432  | MS 68/47 × Co 1148 |
| 17      | Co6425   | Co 312 × BO 10          | 63      | CoS8436  | MS 68/47 × Co 1148 |
| 18      | Co6811   | Co 726 × Co 721         | 64      | CoS88230 | Co 1148 × Co 775   |
| 19      | Co87263  | Co 312 × Co 6806        | 65      | CoS90265 | Co 775 × Co 1148   |
| 20      | CoB94164 | BO 91 × Co 775          | 66      | CoS90269 | Co 7717 × Co 1148  |
| 21      | CoH06265 | CP 61-23 × Co 1148      | 67      | CoS91230 | CoS 775 × Co 1148  |
| 22      | CoH06266 | CoS 95255 GC            | 68      | CoS91269 | BO 91 × Co 1158    |
| 23      | CoH110   | Co 1148 GC              | 69      | CoS94257 | BO 91 × Co 62198   |
| 24      | CoH119   | Co 7704 GC              | 70      | CoS94270 | Co 7704 × MS 68/47 |
| 25      | CoH35    | Co 1148 Self            | 71      | CoS95222 | BO 91 × BO 17      |
| 26      | CoH56    | Co 62174 × Co 7717      | 72      | CoS95255 | Co 1158 × Co 62198 |
| 27      | CoH92    | Co 7704 GC              | 73      | CoS95270 | Co 1158 × CoS 510  |
| 28      | CoH99    | CoH 7803 × CoS 510      | 74      | CoS96258 | CoS 510 Self       |

---

|    |             |                        |    |           |                           |
|----|-------------|------------------------|----|-----------|---------------------------|
| 29 | CoJ64       | Co 976 × Co 617        | 75 | CoS96268  | Co 1158 × Co 62198        |
| 30 | CoJ83       | CoJ 64 x Co 1148       | 76 | CoS96269  |                           |
| 31 | CoJ85       | Q 63 × CoJ 70          | 77 | CoS96275  | CoS 8119 × Co 62198       |
| 32 | CoJ88       | CoJ 82315 × Co 1148    | 78 | CoS97258  | 70A2 GC                   |
| 33 | CoJ89       | LG 72115 × CoJ 82315   | 79 | CoS97261  | 70A2 GC                   |
| 34 | CoLk8001    | Co 62174 × Co 1148     | 80 | CoS97264  | Co 1158 × CoS 510         |
| 35 | CoLk8102    | Co 1158 GC             | 81 | CoS99259  | Co 767 GC                 |
| 36 | CoLk94184   | CoLk 8001 (self)       | 82 | CoSe00235 | CoJ 46 × Co 87268         |
| 37 | CoP9206     | CoC 671 × Co 1148      | 83 | CoSe01235 | CoS 8119 × Co 62198       |
| 38 | CoP9301     | CoC 671 × BO 99        | 84 | CoSe01424 |                           |
| 39 | CoP9302     | BO 91 × Co 62174       | 85 | CoSe92423 | BO 91 × Co 453            |
| 40 | CoP9702     | BO 99 × NCo 310        | 86 | CoSe95422 | BO 91 × Co 453            |
| 41 | CoPant06224 | CoH 7808 PC            | 87 | CoSe95436 | BO 91 × Co 62198          |
| 42 | CoPant84211 | Co 6806 × Co 6912      | 88 | CoSe96436 | BO 91 × Co 62198          |
| 43 | CoPant90223 | CoS 91269 GC           | 89 | CoSe98231 | CoS 7927 × Co 775         |
| 44 | CoPant96219 | CoS 767 × CoPant 84212 | 90 | UP0097    | Seo 1444/91 × Seo 1854/91 |
| 45 | CoPant97222 | CoPant 84212 GC        | 91 | UP05      | CoS 7903 × Co 718         |
| 46 | CoS01256    | Co 86011 × CoS 510     | 92 | UP9530    |                           |

---

Table S2. List of 32 phenotypic descriptors and yield traits that were recorded in 92 sugarcane varieties

| Sl. No                                  | Trait                             | Expression type                                                         |
|-----------------------------------------|-----------------------------------|-------------------------------------------------------------------------|
| <b>Qualitative characteristics (23)</b> |                                   |                                                                         |
| 1                                       | Growth habit                      | Erect, Semi erect                                                       |
| 2                                       | Leaf sheath hairs                 | Absent, Sparse, Dense                                                   |
| 3                                       | Ligule shape                      | Strap, Deltoid, Crescent, Arched                                        |
| 4                                       | Inner auricle                     | Incipient, Deltoid, Dentoid, Unciform, Calcariform, Lanceolate, Falcate |
| 5                                       | Dewlap colour                     | G, G-Y, Y, Y-G, B, P                                                    |
| 6                                       | Curvature                         | Erect, Curved tip, Arched                                               |
| 7                                       | Adherence                         | Weak, Medium, Strong                                                    |
| 8                                       | Internode colour (NE)             | G, G-Y, G-W, Y, Y-G, Y-W, O-W, G-G, G-Y                                 |
| 9                                       | Internode colour (E)              | G-Y, Y-G, Y group, Greyed group, B group, P group                       |
| 10                                      | Internode shape                   | Cylindrical, Bobbin, Tumescant, Conoidal, Obconoidal, Curved            |
| 11                                      | Zig-zag alignment                 | Absent, Present                                                         |
| 12                                      | Rind surface                      | Smooth, Corky, Ivory marks, Corky + Ivory.                              |
| 13                                      | Waxiness                          | Light, Medium, Heavy                                                    |
| 14                                      | Bud shape                         | Ovate, Obovate, Oval, Round, PentaG, Rhom, Rectangular, TP, Beaked      |
| 15                                      | Bud groove                        | Absent, Shallow, Deep                                                   |
| 16                                      | Bud cushion                       | Absent, Present                                                         |
| 17                                      | Bud tip in respect to growth ring | Below growth ring, Touching, Above growth ring                          |
| 18                                      | Prominence of Grt. Ring           | Weak, Strong                                                            |
| 19                                      | Internode Cross sect.             | Round, Oval                                                             |
| 20                                      | Pithiness                         | Absent, Present                                                         |
| 21                                      | Growth crack                      | Absent, Present                                                         |

---

|    |                 |                       |
|----|-----------------|-----------------------|
| 22 | Root band width | Narrow, medium, broad |
| 23 | Bud size        | Small, Medium, Large  |

**Quantitative characteristics (9)**

|    |                                    |
|----|------------------------------------|
| 24 | Leaf blade width (cm)              |
| 25 | Internode diameter (cm)            |
| 26 | Number of millable canes per stool |
| 27 | Plant height (meter)               |
| 28 | Sucrose content (%)                |
| 29 | Fibre per cent                     |
| 30 | Commercial cane sugar              |
| 31 | Brix per cent                      |
| 32 | Purity per cent                    |

---

**Table S3.** Amplicon data and polymorphic information content (PIC) values of 174 SSR primers over the 92 sugarcane varieties

| Sl. No. | Primer*   | Size range of product (bp) | Number of loci amplified | PIC value |
|---------|-----------|----------------------------|--------------------------|-----------|
| 1       | IISR_104  | 90-400                     | 8                        | 0.302     |
| 2       | IISR_111  | 110-380                    | 13                       | 0.553     |
| 3       | IISR_114  | 140-580                    | 12                       | 0.580     |
| 4       | IISR_115  | 140-500                    | 10                       | 0.648     |
| 5       | IISR_116  | 250-380                    | 7                        | 0.493     |
| 6       | IISR_117  | 60-170                     | 4                        | 0.680     |
| 7       | IISR_121  | 20-700                     | 18                       | 0.980     |
| 8       | IISR_123  | 30-1000                    | 15                       | 0.890     |
| 9       | IISR_127  | 145-170                    | 3                        | 0.821     |
| 10      | IISR_131  | 200-800                    | 11                       | 0.980     |
| 11      | IISR_132  | 270-900                    | 5                        | 0.639     |
| 12      | IISR_134a | 500-800                    | 4                        | 0.756     |
| 13      | IISR_134b | 220-300                    | 5                        | 0.343     |
| 14      | IISR_137  | 160-800                    | 12                       | 0.748     |
| 15      | IISR_139  | 120-240                    | 6                        | 0.552     |
| 16      | IISR_140  | 150-400                    | 13                       | 0.419     |
| 17      | IISR_141  | 170-500                    | 5                        | 0.852     |
| 18      | IISR_142  | 120-350                    | 4                        | 0.917     |
| 19      | IISR_144  | 140-300                    | 8                        | 0.493     |
| 20      | IISR_145  | 140-1000                   | 19                       | 0.619     |
| 21      | IISR_146  | 120-350                    | 8                        | 0.468     |
| 22      | IISR_148  | 160-210                    | 3                        | 0.980     |
| 23      | IISR_14a  | 220-800                    | 7                        | 0.448     |
| 24      | IISR_14b  | 250-500                    | 6                        | 0.561     |
| 25      | IISR_156  | 160-260                    | 5                        | 0.826     |
| 26      | IISR_159  | 100-270                    | 6                        | 0.519     |
| 27      | IISR_176a | 150-320                    | 10                       | 0.566     |

---

|    |           |          |    |       |
|----|-----------|----------|----|-------|
| 28 | IISR_176b | 160-800  | 13 | 0.561 |
| 29 | IISR_176c | 90-400   | 13 | 0.538 |
| 30 | IISR_179  | 40-1000  | 27 | 0.860 |
| 31 | IISR_17a  | 150-250  | 7  | 0.525 |
| 32 | IISR_17b  | 140-250  | 5  | 0.517 |
| 33 | IISR_17b  | 160-600  | 8  | 0.930 |
| 34 | IISR_17c  | 160-600  | 9  | 0.582 |
| 35 | IISR_183  | 50-1100  | 17 | 0.980 |
| 36 | IISR_184  | 40-700   | 14 | 0.840 |
| 37 | IISR_199a | 200-500  | 7  | 0.665 |
| 38 | IISR_209  | 140-400  | 6  | 0.568 |
| 39 | IISR_210  | 150-420  | 7  | 0.730 |
| 40 | IISR_213  | 900-1200 | 3  | 0.764 |
| 41 | IISR_227  | 90-170   | 8  | 0.321 |
| 42 | IISR_236  | 160-1040 | 13 | 0.960 |
| 43 | IISR_255  | 40-590   | 12 | 0.860 |
| 44 | IISR_256  | 150-270  | 7  | 0.565 |
| 45 | IISR_259  | 300-350  | 2  | 0.778 |
| 46 | IISR_261  | 140-300  | 5  | 0.341 |
| 47 | IISR_267  | 150-370  | 5  | 0.567 |
| 48 | IISR_269  | 150-900  | 11 | 0.560 |
| 49 | IISR_270  | 335-1000 | 17 | 0.990 |
| 50 | IISR_275  | 350-1000 | 4  | 0.847 |
| 51 | IISR_276  | 100-700  | 11 | 0.661 |
| 52 | IISR_279  | 800-1350 | 6  | 0.990 |
| 53 | IISR_281  | 30-700   | 16 | 0.780 |
| 54 | IISR_288  | 140-260  | 7  | 0.480 |
| 55 | IISR_298a | 140-400  | 7  | 0.612 |
| 56 | IISR_298b | 130-350  | 8  | 0.670 |
| 57 | IISR_299  | 150-340  | 5  | 0.509 |

---

---

|    |           |          |    |       |
|----|-----------|----------|----|-------|
| 58 | IISR_306  | 130-650  | 14 | 0.521 |
| 59 | IISR_308a | 100-400  | 9  | 0.630 |
| 60 | IISR_308b | 180-500  | 8  | 0.681 |
| 61 | IISR_310  | 110-300  | 9  | 0.381 |
| 62 | IISR_313  | 130-340  | 9  | 0.386 |
| 63 | IISR_317  | 90-400   | 9  | 0.441 |
| 64 | IISR_319  | 100-140  | 4  | 0.498 |
| 65 | IISR_322  | 70-600   | 16 | 0.920 |
| 66 | IISR_333  | 130-150  | 3  | 0.586 |
| 67 | IISR_335a | 150-500  | 9  | 0.373 |
| 68 | IISR_335b | 210-700  | 7  | 0.446 |
| 69 | IISR_336  | 120-370  | 8  | 0.464 |
| 70 | IISR_337  | 450-1000 | 6  | 0.296 |
| 71 | IISR_338  | 30-800   | 11 | 0.970 |
| 72 | IISR_34   | 140-400  | 7  | 0.651 |
| 73 | IISR_4    | 140-500  | 9  | 0.329 |
| 74 | IISR_42   | 160-310  | 7  | 0.542 |
| 75 | IISR_46b  | 160-280  | 5  | 0.475 |
| 76 | IISR_48   | 30-1000  | 17 | 0.860 |
| 77 | IISR_7    | 30-600   | 6  | 0.693 |
| 78 | IISR_74   | 250-1000 | 4  | 0.644 |
| 79 | IISR_75   | 150-350  | 2  | 0.532 |
| 80 | IISR_76   | 150-420  | 6  | 0.511 |
| 81 | IISR_77   | 160-600  | 9  | 0.435 |
| 82 | IISR_78   | 70-700   | 10 | 0.655 |
| 83 | IISR_80   | 120-300  | 8  | 0.748 |
| 84 | IISR_81a  | 130-500  | 14 | 0.400 |
| 85 | IISR_81b  | 130-590  | 14 | 0.422 |
| 86 | IISR_82a  | 200-580  | 7  | 0.755 |
| 87 | IISR_82b  | 140-550  | 10 | 0.706 |

---

---

|     |          |          |    |       |
|-----|----------|----------|----|-------|
| 88  | IISR_88a | 140-450  | 13 | 0.533 |
| 89  | IISR_89  | 150-500  | 7  | 0.368 |
| 90  | IISR_9   | 150-170  | 3  | 0.537 |
| 91  | IISR_90  | 360-400  | 3  | 0.262 |
| 92  | IISR_91  | 110-500  | 8  | 0.655 |
| 93  | IISR_94a | 150-300  | 7  | 0.702 |
| 94  | IISR_98  | 35-70    | 3  | 0.968 |
| 95  | EST A15  | 30-800   | 14 | 0.633 |
| 96  | EST A19  | 90-900   | 9  | 0.586 |
| 97  | EST A26  | 160-600  | 8  | 0.544 |
| 98  | EST A48  | 150-800  | 12 | 0.294 |
| 99  | EST A51  | 200-700  | 9  | 0.500 |
| 100 | EST A63  | 200-1000 | 16 | 0.491 |
| 101 | EST A64  | 40-1000  | 20 | 0.663 |
| 102 | EST A66  | 80-1000  | 11 | 0.319 |
| 103 | EST A68  | 120-200  | 5  | 0.483 |
| 104 | EST A70  | 30-1000  | 20 | 0.650 |
| 105 | EST A71  | 60-750   | 14 | 0.847 |
| 106 | EST B13  | 50-1100  | 12 | 0.639 |
| 107 | EST B133 | 30-1020  | 23 | 0.435 |
| 108 | EST B134 | 80-1300  | 15 | 0.520 |
| 109 | EST B135 | 100-1200 | 8  | 0.591 |
| 110 | EST B14  | 280-1200 | 9  | 0.721 |
| 111 | EST B145 | 30-1200  | 22 | 0.616 |
| 112 | EST B157 | 40-1100  | 19 | 0.722 |
| 113 | EST B37  | 150-1200 | 12 | 0.444 |
| 114 | EST B39  | 40-1300  | 24 | 0.517 |
| 115 | EST B40  | 140-1300 | 16 | 0.552 |
| 116 | ESTA61   | 250-750  | 7  | 0.610 |
| 117 | ESTA69   | 190-800  | 12 | 0.649 |

---



---

|     |           |          |    |       |
|-----|-----------|----------|----|-------|
| 118 | ESTB136   | 130-750  | 9  | 0.590 |
| 119 | ESTB145   | 150-700  | 9  | 0.733 |
| 120 | ESTB146   | 75-750   | 11 | 0.665 |
| 121 | ESTB147   | 40-450   | 13 | 0.595 |
| 122 | ESTB149   | 120-750  | 10 | 0.409 |
| 123 | SCA01     | 370-1000 | 6  | 0.738 |
| 124 | SCA08     | 150-500  | 9  | 0.714 |
| 125 | SCB01     | 110-1000 | 14 | 0.784 |
| 126 | SCB02     | 50-750   | 11 | 0.775 |
| 127 | SCB08     | 330-1000 | 6  | 0.485 |
| 128 | SCB10     | 100-600  | 8  | 0.446 |
| 129 | SCC01     | 250-800  | 7  | 0.640 |
| 130 | SCC02     | 180-600  | 9  | 0.422 |
| 131 | SCC04     | 180-700  | 7  | 0.570 |
| 132 | NKS05     | 160-500  | 7  | 0.627 |
| 133 | NKS06     | 150-450  | 9  | 0.716 |
| 134 | NKS11     | 150-1000 | 18 | 0.670 |
| 135 | NKS28     | 80-1000  | 16 | 0.970 |
| 136 | NKS29     | 140-900  | 17 | 0.760 |
| 137 | NKS32     | 40-900   | 18 | 0.660 |
| 138 | NKS40     | 120-210  | 7  | 0.767 |
| 139 | NKS43     | 160-1200 | 18 | 0.930 |
| 140 | NKS49     | 140-1000 | 17 | 0.960 |
| 141 | NKS50     | 100-900  | 18 | 0.990 |
| 142 | NKS51     | 140-500  | 12 | 0.750 |
| 143 | NKS52     | 120-400  | 13 | 0.720 |
| 144 | NKS53     | 70-1000  | 12 | 0.980 |
| 145 | NKS56     | 200-1100 | 19 | 0.950 |
| 146 | SEGMS113a | 50-550   | 11 | 0.390 |
| 147 | SEGMS121  | 50-200   | 5  | 0.120 |

---

|     |           |          |    |       |
|-----|-----------|----------|----|-------|
| 148 | SEGMS14   | 310-1000 | 10 | 0.288 |
| 149 | SEGMS16a  | 240-400  | 3  | 0.150 |
| 150 | SEGMS17   | 130-500  | 8  | 0.537 |
| 151 | SEGMS20   | 40-700   | 17 | 0.445 |
| 152 | SEGMS215  | 180-1200 | 11 | 0.410 |
| 153 | SEGMS23   | 370-1000 | 8  | 0.600 |
| 154 | SEGMS23   | 250-1100 | 9  | 0.531 |
| 155 | SEGMS235  | 60-1000  | 4  | 0.180 |
| 156 | SEGMS249a | 290-1000 | 7  | 0.580 |
| 157 | SEGMS249a | 275-1200 | 9  | 0.377 |
| 158 | SEGMS25b  | 50-800   | 9  | 0.431 |
| 159 | SEGMS32   | 70-1300  | 18 | 0.445 |
| 160 | SEGMS35   | 40-120   | 5  | 0.488 |
| 161 | SEGMS38   | 185-1000 | 14 | 0.430 |
| 162 | SEGMS40   | 50-1000  | 7  | 0.520 |
| 163 | SEGMS44   | 40-800   | 15 | 0.340 |
| 164 | SEGMS63   | 150-1100 | 14 | 0.680 |
| 165 | SEGMS65   | 40-1200  | 13 | 0.330 |
| 166 | SEGMS70   | 40-1100  | 17 | 0.468 |
| 167 | SEGMS73   | 50-800   | 14 | 0.585 |
| 168 | SEGMS770  | 160-1000 | 9  | 0.320 |
| 169 | SEGMS780  | 125-500  | 7  | 0.108 |
| 170 | SEGMS1016 | 50-700   | 16 | 0.656 |
| 171 | SEGMS1020 | 50-700   | 12 | 0.803 |
| 172 | SEGMS11   | 180-800  | 9  | 0.723 |
| 173 | SEGMS114  | 50-500   | 6  | 0.651 |
| 174 | SEGMS118a | 30-550   | 14 | 0.529 |

\*Primers with prefix IISR have been adopted from Singh et al. (2013), EST- from Oliveira et al. (2009), SC- from Pinto et al. (2004), NKS- from Govindaraj et al. (2005), and SEGMS- from Parida et al. (2009)

**Table S5** Mean data for the nine quantitative traits recorded in 92 sugarcane varieties over the three years (2011-12, 2012-13 and 2013-14)

| Variety   | Trait |      |      |      |       |       |       |       |       |
|-----------|-------|------|------|------|-------|-------|-------|-------|-------|
|           | NMC   | LBW  | ID   | PH   | FP    | SP    | CB    | PP    | CCS   |
| BO 109    | 6.67  | 4.19 | 2.32 | 2.37 | 13.45 | 12.81 | 14.42 | 88.96 | 8.88  |
| BO 110    | 6.33  | 4.09 | 2.60 | 2.26 | 13.87 | 14.88 | 17.89 | 83.22 | 9.98  |
| BO 120    | 6.17  | 4.00 | 2.35 | 2.23 | 18.00 | 16.36 | 19.29 | 84.83 | 11.09 |
| BO 128    | 6.67  | 4.30 | 2.56 | 2.32 | 15.15 | 15.66 | 18.04 | 86.88 | 10.74 |
| BO 129    | 5.67  | 3.93 | 2.51 | 2.28 | 14.58 | 14.52 | 17.26 | 84.08 | 9.80  |
| BO 130    | 5.33  | 4.49 | 2.36 | 2.13 | 16.82 | 17.03 | 20.05 | 84.93 | 11.55 |
| BO 136    | 6.83  | 3.71 | 2.37 | 2.09 | 15.65 | 14.57 | 17.52 | 83.16 | 9.77  |
| BO 137    | 7.83  | 4.30 | 2.28 | 2.07 | 17.06 | 15.62 | 18.38 | 84.96 | 10.59 |
| BO 138    | 5.50  | 4.30 | 2.33 | 2.20 | 17.46 | 14.59 | 17.52 | 83.38 | 9.79  |
| BO 91     | 8.33  | 3.97 | 2.31 | 2.28 | 14.28 | 14.96 | 18.04 | 82.97 | 10.02 |
| BO 99     | 8.50  | 3.58 | 2.68 | 2.21 | 13.26 | 14.05 | 17.01 | 82.77 | 9.39  |
| Co 1148   | 5.67  | 4.33 | 2.44 | 2.34 | 13.78 | 12.60 | 14.94 | 84.41 | 8.52  |
| Co 1158   | 5.50  | 3.32 | 2.40 | 2.26 | 16.93 | 14.86 | 17.19 | 86.44 | 10.17 |
| Co 1336   | 9.33  | 3.08 | 2.24 | 2.22 | 16.65 | 12.40 | 15.14 | 81.95 | 8.25  |
| Co 419    | 6.00  | 2.67 | 2.50 | 2.15 | 14.20 | 12.72 | 15.72 | 80.95 | 8.42  |
| Co 453    | 4.17  | 3.27 | 2.37 | 2.21 | 15.36 | 15.25 | 17.58 | 86.76 | 10.45 |
| Co 6425   | 5.83  | 4.48 | 2.47 | 2.13 | 13.98 | 13.55 | 15.97 | 84.82 | 9.18  |
| Co 6811   | 6.83  | 4.12 | 2.54 | 2.03 | 17.51 | 15.77 | 17.66 | 89.27 | 10.96 |
| Co 87263  | 4.83  | 4.87 | 2.81 | 2.48 | 13.91 | 16.73 | 19.72 | 84.84 | 11.34 |
| Co 89003  | 4.33  | 3.27 | 2.26 | 2.19 | 13.37 | 16.18 | 18.44 | 87.72 | 11.15 |
| Co 89029  | 5.00  | 4.14 | 2.30 | 2.33 | 17.04 | 14.79 | 17.72 | 83.50 | 9.95  |
| CoB 94164 | 8.17  | 3.74 | 2.38 | 2.43 | 14.22 | 14.09 | 16.47 | 85.51 | 9.59  |
| CoH 110   | 6.17  | 4.75 | 3.36 | 2.45 | 14.45 | 13.97 | 16.84 | 82.95 | 9.36  |
| CoH 119   | 4.83  | 4.56 | 2.86 | 2.18 | 13.87 | 12.40 | 14.92 | 83.23 | 8.32  |
| CoH 35    | 4.33  | 4.22 | 3.05 | 2.40 | 16.60 | 12.75 | 15.50 | 82.27 | 8.50  |
| CoH 56    | 6.17  | 4.60 | 2.64 | 2.20 | 14.85 | 14.95 | 17.83 | 83.82 | 10.07 |

---

|              |      |      |      |      |       |       |       |       |       |
|--------------|------|------|------|------|-------|-------|-------|-------|-------|
| CoH 92       | 5.33 | 4.21 | 3.07 | 2.04 | 11.48 | 16.25 | 18.57 | 87.65 | 11.19 |
| CoH 99       | 3.67 | 3.62 | 2.85 | 2.15 | 15.10 | 13.94 | 16.80 | 82.85 | 9.34  |
| CoJ 64       | 5.00 | 4.40 | 2.50 | 2.39 | 15.25 | 17.40 | 20.24 | 85.99 | 11.87 |
| CoJ 83       | 5.33 | 4.42 | 2.98 | 2.32 | 14.64 | 16.09 | 18.71 | 86.00 | 10.98 |
| CoJ 85       | 4.17 | 5.13 | 3.41 | 2.17 | 11.18 | 16.34 | 19.43 | 84.16 | 11.02 |
| CoJ 88       | 7.67 | 5.02 | 2.59 | 2.36 | 15.79 | 16.15 | 19.19 | 84.26 | 10.90 |
| CoJ 89       | 6.67 | 4.22 | 2.70 | 2.33 | 14.54 | 12.95 | 16.16 | 80.30 | 8.52  |
| CoLk 8001    | 5.17 | 4.54 | 2.68 | 2.47 | 17.68 | 14.40 | 16.75 | 85.94 | 9.82  |
| CoLk 8102    | 5.67 | 3.95 | 2.48 | 2.36 | 14.68 | 14.00 | 16.61 | 84.30 | 9.46  |
| CoLk 94184   | 4.83 | 4.12 | 2.24 | 2.47 | 15.48 | 16.81 | 19.78 | 84.98 | 11.40 |
| CoP 9206     | 5.17 | 4.31 | 2.44 | 2.25 | 17.88 | 12.98 | 15.80 | 82.24 | 8.66  |
| CoP 9301     | 5.17 | 3.42 | 2.25 | 2.17 | 13.71 | 16.31 | 18.37 | 88.80 | 11.31 |
| CoP 9302     | 7.50 | 5.13 | 2.32 | 2.29 | 20.18 | 12.44 | 15.39 | 80.89 | 8.23  |
| CoP 9702     | 7.17 | 3.68 | 2.44 | 2.29 | 14.89 | 11.70 | 14.24 | 82.19 | 7.80  |
| CoPant 84211 | 4.17 | 4.67 | 2.42 | 2.30 | 14.22 | 16.35 | 19.28 | 84.83 | 11.08 |
| CoPant 84212 | 7.17 | 4.30 | 2.53 | 2.35 | 12.24 | 14.53 | 17.37 | 83.63 | 9.78  |
| CoPant 90223 | 7.33 | 4.92 | 2.53 | 2.18 | 12.36 | 15.83 | 18.49 | 85.61 | 10.78 |
| CoPant 96219 | 6.50 | 5.83 | 2.85 | 2.31 | 11.69 | 15.88 | 18.99 | 83.61 | 10.68 |
| CoPant 97222 | 5.83 | 4.62 | 2.84 | 2.15 | 14.01 | 14.73 | 17.59 | 83.75 | 9.91  |
| CoS 01256    | 5.67 | 4.16 | 2.60 | 2.20 | 14.03 | 13.23 | 15.94 | 83.06 | 8.86  |
| CoS 02258    | 4.83 | 3.97 | 2.40 | 2.14 | 13.67 | 14.58 | 17.54 | 83.24 | 9.78  |
| CoS 02264    | 4.33 | 3.64 | 2.35 | 1.87 | 13.96 | 15.52 | 18.47 | 84.07 | 10.47 |
| CoS 03279    | 4.83 | 3.09 | 2.42 | 2.26 | 13.41 | 16.92 | 19.63 | 86.16 | 11.56 |
| CoS 109      | 6.83 | 3.58 | 2.41 | 2.20 | 17.14 | 15.01 | 18.20 | 82.46 | 10.03 |
| CoS 245      | 4.33 | 3.53 | 2.26 | 2.13 | 15.20 | 14.90 | 17.83 | 83.49 | 10.02 |
| CoS 443      | 7.33 | 3.57 | 2.18 | 1.45 | 14.08 | 14.76 | 17.47 | 84.47 | 9.98  |
| CoS 510      | 5.33 | 3.45 | 2.13 | 1.43 | 14.80 | 15.97 | 18.41 | 86.72 | 10.94 |
| CoS 514      | 3.83 | 2.33 | 2.37 | 1.67 | 16.00 | 15.10 | 17.62 | 85.65 | 10.29 |
| CoS 541      | 5.00 | 4.15 | 2.28 | 1.51 | 14.44 | 13.18 | 16.09 | 81.96 | 8.77  |
| CoS 687      | 6.33 | 4.29 | 2.41 | 1.72 | 11.52 | 14.64 | 17.11 | 85.57 | 9.96  |

---

---

|            |      |      |      |      |       |       |       |       |       |
|------------|------|------|------|------|-------|-------|-------|-------|-------|
| CoS 767    | 5.33 | 4.09 | 2.53 | 2.35 | 15.45 | 14.11 | 16.34 | 86.37 | 9.64  |
| CoS 770    | 5.50 | 4.57 | 2.64 | 2.31 | 12.27 | 11.15 | 13.43 | 83.33 | 7.47  |
| CoS 797    | 6.67 | 2.41 | 2.28 | 1.33 | 16.58 | 11.70 | 13.64 | 85.97 | 7.97  |
| CoS 8207   | 6.00 | 4.13 | 2.73 | 2.15 | 13.98 | 14.08 | 16.71 | 84.31 | 9.51  |
| CoS 8315   | 5.33 | 3.98 | 2.39 | 2.23 | 14.08 | 13.60 | 16.82 | 80.84 | 8.99  |
| CoS 8432   | 5.00 | 5.19 | 2.77 | 2.00 | 12.09 | 15.07 | 17.88 | 84.28 | 10.18 |
| CoS 8436   | 4.83 | 4.44 | 3.06 | 1.96 | 13.61 | 16.14 | 18.23 | 88.60 | 11.17 |
| CoS 88230  | 4.83 | 5.23 | 2.93 | 2.18 | 10.30 | 15.77 | 18.26 | 86.35 | 10.78 |
| CoS 90265  | 3.50 | 2.06 | 2.31 | 1.95 | 12.44 | 13.94 | 16.69 | 83.51 | 9.37  |
| CoS 90269  | 6.50 | 3.72 | 2.35 | 1.87 | 13.21 | 14.66 | 17.59 | 83.29 | 9.84  |
| CoS 91230  | 3.83 | 3.84 | 2.45 | 2.02 | 11.16 | 15.46 | 17.91 | 86.26 | 10.57 |
| CoS 91269  | 5.00 | 4.42 | 2.36 | 2.28 | 15.89 | 12.80 | 15.44 | 82.89 | 8.57  |
| CoS 94257  | 7.00 | 4.21 | 2.46 | 2.23 | 13.60 | 13.78 | 16.50 | 83.51 | 9.26  |
| CoS 94270  | 7.17 | 4.31 | 2.77 | 2.23 | 12.15 | 13.23 | 16.42 | 80.56 | 8.73  |
| CoS 95222  | 7.17 | 3.22 | 2.48 | 2.27 | 13.54 | 15.10 | 17.74 | 85.14 | 10.25 |
| CoS 95255  | 5.67 | 4.10 | 2.48 | 2.26 | 12.63 | 18.06 | 20.19 | 89.46 | 12.56 |
| CoS 95270  | 8.33 | 4.11 | 2.43 | 2.32 | 12.47 | 14.47 | 16.94 | 85.41 | 9.84  |
| CoS 96258  | 6.00 | 5.20 | 2.98 | 1.94 | 10.38 | 15.81 | 18.41 | 85.87 | 10.78 |
| CoS 96268  | 4.67 | 3.53 | 2.31 | 2.19 | 11.90 | 17.18 | 19.74 | 87.05 | 11.79 |
| CoS 96269  | 6.83 | 3.66 | 2.38 | 2.47 | 12.98 | 14.42 | 16.91 | 85.28 | 9.80  |
| CoS 96275  | 6.67 | 4.54 | 2.48 | 2.35 | 12.85 | 15.63 | 18.60 | 84.05 | 10.55 |
| CoS 97258  | 5.33 | 3.68 | 2.45 | 2.20 | 14.16 | 13.40 | 16.52 | 81.15 | 8.87  |
| CoS 97261  | 7.00 | 4.65 | 2.48 | 2.14 | 16.54 | 15.55 | 18.59 | 83.66 | 10.47 |
| CoS 97264  | 7.17 | 3.75 | 2.63 | 2.15 | 12.82 | 14.88 | 17.73 | 83.88 | 10.03 |
| CoS 99259  | 6.83 | 4.73 | 2.70 | 1.84 | 8.97  | 14.85 | 17.70 | 83.90 | 10.01 |
| CoSe 00235 | 7.17 | 3.98 | 2.58 | 2.34 | 14.80 | 15.12 | 17.66 | 85.60 | 10.29 |
| CoSe 01235 | 6.17 | 3.97 | 2.30 | 2.17 | 15.59 | 17.55 | 20.56 | 85.35 | 11.93 |
| CoSe 01424 | 7.00 | 3.78 | 2.48 | 2.21 | 13.03 | 14.89 | 17.60 | 84.62 | 10.08 |
| CoSe 92423 | 6.50 | 4.76 | 2.85 | 2.48 | 14.89 | 13.56 | 16.75 | 81.02 | 8.97  |
| CoSe 95422 | 6.67 | 4.24 | 2.29 | 2.15 | 12.39 | 14.08 | 16.54 | 85.14 | 9.56  |

---

---

|            |      |      |      |      |       |       |       |       |       |
|------------|------|------|------|------|-------|-------|-------|-------|-------|
| CoSe 95436 | 4.67 | 3.54 | 2.42 | 2.09 | 13.72 | 14.77 | 16.93 | 87.15 | 10.15 |
| CoSe 96436 | 7.50 | 4.25 | 2.26 | 2.27 | 17.95 | 14.98 | 17.99 | 83.32 | 10.06 |
| CoSe 98231 | 6.50 | 4.55 | 2.58 | 1.73 | 13.78 | 14.19 | 17.13 | 82.83 | 9.50  |
| UP 0097    | 6.50 | 4.44 | 2.62 | 2.37 | 12.87 | 13.39 | 15.61 | 85.77 | 9.13  |
| UP 05      | 5.67 | 3.64 | 2.08 | 2.22 | 14.09 | 13.95 | 17.32 | 80.55 | 9.20  |
| UP 9530    | 7.17 | 4.37 | 2.43 | 2.24 | 17.62 | 15.13 | 17.31 | 87.41 | 10.41 |

---

NMC: number of millable canes, LBW: leaf blade width, ID: internode diameter, PH: plant height, FP: fibre per cent, SP: sucrose per cent, CB: corrected Brix, PP: purity per cent, CCS: commercial cane sugar.
