# Supplementary material
Source: PubMed Central journal article supplement (PMC5313407)
Supplement: 12298_2016_403_MOESM2_ESM.pdf [file 12298_2016_403_MOESM2_ESM.pdf]

**Online Resource 4** Characterization (scoring) of 92 sugarcane varieties based on the 23 qualitative descriptors (score assigned as per DUS guidelines for sugarcane, Anonymous, 2009)

| Variety      | Replication | Plant growth habit |      |      | Leaf sheath Hairiness |      |      | Shape of ligule |      |      | Shape of inner auricle |      |      | Colour of Dewlap |      |      | Curvature |      |      | Adherence of leaf sheath |      |      | Internode: Colour (exposed to sun) |      |      | Internode: Shap |      |      | Internode: Zigzag Alignment |      |      | Growth crack (split) |      |      |   |   |   |
|--------------|-------------|--------------------|------|------|-----------------------|------|------|-----------------|------|------|------------------------|------|------|------------------|------|------|-----------|------|------|--------------------------|------|------|------------------------------------|------|------|-----------------|------|------|-----------------------------|------|------|----------------------|------|------|---|---|---|
|              |             | 2012               | 2013 | 2014 | 2012                  | 2013 | 2014 | 2012            | 2013 | 2014 | 2012                   | 2013 | 2014 | 2012             | 2013 | 2014 | 2012      | 2013 | 2014 | 2012                     | 2013 | 2014 | 2012                               | 2013 | 2014 | 2012            | 2013 | 2014 | 2012                        | 2013 | 2014 | 2012                 | 2013 | 2014 |   |   |   |
| CoPant 96219 | R1          | 1                  | 1    | 1    | 5                     | 5    | 5    | 3               | 3    | 3    | 6                      | 6    | 6    | 1                | 1    | 1    | 3         | 3    | 3    | 5                        | 5    | 5    | 4                                  | 4    | 4    | 2               | 2    | 2    | 1                           | 1    | 1    | 1                    | 1    | 1    | 1 | 1 | 1 |
|              | R2          | 1                  | 1    | 1    | 5                     | 5    | 5    | 3               | 3    | 3    | 6                      | 6    | 6    | 1                | 1    | 1    | 3         | 3    | 3    | 5                        | 5    | 5    | 4                                  | 4    | 4    | 2               | 2    | 2    | 1                           | 1    | 1    | 1                    | 1    | 1    | 1 | 1 | 1 |
| CoS 03279    | R1          | 1                  | 1    | 1    | 1                     | 1    | 1    | 2               | 2    | 2    | 1                      | 1    | 1    | 1                | 1    | 1    | 2         | 2    | 2    | 3                        | 3    | 3    | 5                                  | 5    | 5    | 2               | 2    | 2    | 1                           | 1    | 1    | 1                    | 1    | 1    | 1 | 1 | 1 |
|              | R2          | 1                  | 1    | 1    | 1                     | 1    | 1    | 2               | 2    | 2    | 1                      | 1    | 1    | 1                | 1    | 1    | 2         | 2    | 2    | 3                        | 3    | 3    | 5                                  | 5    | 5    | 2               | 2    | 2    | 1                           | 1    | 1    | 1                    | 1    | 1    | 1 | 1 | 1 |
| CoSe 92423   | R1          | 1                  | 1    | 1    | 1                     | 1    | 1    | 3               | 3    | 3    | 2                      | 2    | 2    | 1                | 1    | 1    | 2         | 2    | 2    | 3                        | 3    | 3    | 3                                  | 3    | 3    | 2               | 2    | 2    | 1                           | 1    | 1    | 1                    | 1    | 1    | 1 | 1 | 1 |
|              | R2          | 1                  | 1    | 1    | 1                     | 1    | 1    | 3               | 3    | 3    | 2                      | 2    | 2    | 1                | 1    | 1    | 2         | 2    | 2    | 3                        | 3    | 3    | 3                                  | 3    | 3    | 2               | 2    | 2    | 1                           | 1    | 1    | 1                    | 1    | 1    | 1 | 1 | 1 |
| CoH 92       | R1          | 2                  | 2    | 2    | 3                     | 3    | 3    | 3               | 3    | 3    | 2                      | 2    | 2    | 1                | 1    | 1    | 2         | 2    | 2    | 5                        | 5    | 5    | 5                                  | 5    | 5    | 2               | 2    | 2    | 1                           | 1    | 1    | 1                    | 1    | 1    | 1 | 1 | 1 |
|              | R2          | 2                  | 2    | 2    | 3                     | 3    | 3    | 3               | 3    | 3    | 2                      | 2    | 2    | 1                | 1    | 1    | 2         | 2    | 2    | 5                        | 5    | 5    | 5                                  | 5    | 5    | 2               | 2    | 2    | 1                           | 1    | 1    | 1                    | 1    | 1    | 1 | 1 | 1 |
| CoS 95255    | R1          | 1                  | 1    | 1    | 1                     | 1    | 1    | 3               | 3    | 3    | 6                      | 6    | 6    | 1                | 1    | 1    | 2         | 2    | 2    | 3                        | 3    | 3    | 1                                  | 1    | 1    | 2               | 2    | 2    | 3                           | 3    | 3    | 1                    | 1    | 1    | 1 | 1 | 1 |
|              | R2          | 1                  | 1    | 1    | 1                     | 1    | 1    | 3               | 3    | 3    | 6                      | 6    | 6    | 1                | 1    | 1    | 2         | 2    | 2    | 3                        | 3    | 3    | 1                                  | 1    | 1    | 2               | 2    | 2    | 3                           | 3    | 3    | 1                    | 1    | 1    | 1 | 1 | 1 |
| CoS 97264    | R1          | 1                  | 1    | 1    | 1                     | 1    | 1    | 3               | 3    | 3    | 6                      | 6    | 6    | 6                | 6    | 6    | 2         | 2    | 2    | 3                        | 3    | 3    | 1                                  | 1    | 1    | 2               | 2    | 2    | 1                           | 1    | 1    | 1                    | 1    | 1    | 1 | 1 | 1 |
|              | R2          | 1                  | 1    | 1    | 1                     | 1    | 1    | 3               | 3    | 3    | 6                      | 6    | 6    | 6                | 6    | 6    | 2         | 2    | 2    | 3                        | 3    | 3    | 1                                  | 1    | 1    | 2               | 2    | 2    | 1                           | 1    | 1    | 1                    | 1    | 1    | 1 | 1 | 1 |
| CoSe 96436   | R1          | 2                  | 2    | 2    | 1                     | 1    | 1    | 3               | 3    | 3    | 1                      | 1    | 1    | 1                | 1    | 1    | 2         | 2    | 2    | 3                        | 3    | 3    | 5                                  | 5    | 5    | 2               | 2    | 2    | 1                           | 1    | 1    | 9                    | 9    | 9    |   |   |   |
|              | R2          | 2                  | 2    | 2    | 1                     | 1    | 1    | 3               | 3    | 3    | 1                      | 1    | 1    | 1                | 1    | 1    | 2         | 2    | 2    | 3                        | 3    | 3    | 5                                  | 5    | 5    | 2               | 2    | 2    | 1                           | 1    | 1    | 9                    | 9    | 9    |   |   |   |
| CoJ 89       | R1          | 1                  | 1    | 1    | 3                     | 3    | 3    | 3               | 3    | 3    | 6                      | 6    | 6    | 1                | 1    | 1    | 2         | 2    | 2    | 3                        | 3    | 3    | 4                                  | 4    | 4    | 2               | 2    | 2    | 1                           | 1    | 1    | 1                    | 1    | 1    | 1 | 1 | 1 |
|              | R2          | 1                  | 1    | 1    | 3                     | 3    | 3    | 3               | 3    | 3    | 6                      | 6    | 6    | 1                | 1    | 1    | 2         | 2    | 2    | 3                        | 3    | 3    | 4                                  | 4    | 4    | 2               | 2    | 2    | 1                           | 1    | 1    | 1                    | 1    | 1    | 1 | 1 | 1 |
| CoH 119      | R1          | 1                  | 1    | 1    | 1                     | 1    | 1    | 1               | 1    | 1    | 6                      | 6    | 6    | 1                | 1    | 1    | 2         | 2    | 2    | 3                        | 3    | 3    | 1                                  | 1    | 1    | 2               | 2    | 2    | 2                           | 2    | 2    | 1                    | 1    | 1    | 1 | 1 | 1 |
|              | R2          | 1                  | 1    | 1    | 1                     | 1    | 1    | 1               | 1    | 1    | 6                      | 6    | 6    | 1                | 1    | 1    | 2         | 2    | 2    | 3                        | 3    | 3    | 1                                  | 1    | 1    | 2               | 2    | 2    | 2                           | 2    | 2    | 1                    | 1    | 1    | 1 | 1 | 1 |
| CoSe 95436   | R1          | 1                  | 1    | 1    | 1                     | 1    | 1    | 3               | 3    | 3    | 2                      | 2    | 2    | 4                | 4    | 4    | 3         | 3    | 3    | 3                        | 3    | 3    | 5                                  | 5    | 5    | 2               | 2    | 2    | 3                           | 3    | 3    | 1                    | 1    | 1    | 1 | 1 | 1 |
|              | R2          | 1                  | 1    | 1    | 1                     | 1    | 1    | 3               | 3    | 3    | 2                      | 2    | 2    | 4                | 4    | 4    | 3         | 3    | 3    | 3                        | 3    | 3    | 5                                  | 5    | 5    | 2               | 2    | 2    | 3                           | 3    | 3    | 1                    | 1    | 1    | 1 | 1 | 1 |
| BO 128       | R1          | 1                  | 1    | 1    | 1                     | 1    | 1    | 3               | 3    | 3    | 2                      | 2    | 2    | 6                | 6    | 6    | 3         | 3    | 3    | 5                        | 5    | 5    | 1                                  | 1    | 1    | 2               | 2    | 2    | 1                           | 1    | 1    | 1                    | 1    | 1    | 1 | 1 | 1 |
|              | R2          | 1                  | 1    | 1    | 1                     | 1    | 1    | 3               | 3    | 3    | 2                      | 2    | 2    | 6                | 6    | 6    | 3         | 3    | 3    | 5                        | 5    | 5    | 1                                  | 1    | 1    | 2               | 2    | 2    | 1                           | 1    | 1    | 1                    | 1    | 1    | 1 | 1 | 1 |
| Co 453       | R1          | 1                  | 1    | 1    | 1                     | 1    | 1    | 3               | 3    | 3    | 2                      | 2    | 2    | 1                | 1    | 1    | 2         | 2    | 2    | 3                        | 3    | 3    | 5                                  | 5    | 5    | 2               | 2    | 2    | 3                           | 3    | 3    | 1                    | 1    | 1    | 1 | 1 | 1 |
|              | R2          | 1                  | 1    | 1    | 1                     | 1    | 1    | 3               | 3    | 3    | 2                      | 2    | 2    | 1                | 1    | 1    | 2         | 2    | 2    | 3                        | 3    | 3    | 5                                  | 5    | 5    | 2               | 2    | 2    | 3                           | 3    | 3    | 1                    | 1    | 1    | 1 | 1 | 1 |
| CoPant 84211 | R1          | 1                  | 1    | 1    | 1                     | 1    | 1    | 2               | 2    | 2    | 2                      | 2    | 2    | 2                | 2    | 2    | 2         | 2    | 2    | 5                        | 5    | 5    | 5                                  | 5    | 5    | 2               | 2    | 2    | 1                           | 1    | 1    | 9                    | 9    | 9    |   |   |   |
|              | R2          | 1                  | 1    | 1    | 1                     | 1    | 1    | 2               | 2    | 2    | 2                      | 2    | 2    | 2                | 2    | 2    | 2         | 2    | 2    | 5                        | 5    | 5    | 5                                  | 5    | 5    | 2               | 2    | 2    | 1                           | 1    | 1    | 9                    | 9    | 9    |   |   |   |
| CoS 514      | R1          | 1                  | 1    | 1    | 3                     | 3    | 3    | 3               | 3    | 3    | 2                      | 2    | 2    | 1                | 1    | 1    | 2         | 2    | 2    | 3                        | 3    | 3    | 1                                  | 1    | 1    | 2               | 2    | 2    | 1                           | 1    | 1    | 1                    | 1    | 1    | 1 | 1 | 1 |
|              | R2          | 1                  | 1    | 1    | 3                     | 3    | 3    | 3               | 3    | 3    | 2                      | 2    | 2    | 1                | 1    | 1    | 2         | 2    | 2    | 3                        | 3    | 3    | 1                                  | 1    | 1    | 2               | 2    | 2    | 1                           | 1    | 1    | 1                    | 1    | 1    | 1 | 1 | 1 |
| CoJ 83       | R1          | 1                  | 1    | 1    | 1                     | 1    | 1    | 1               | 1    | 1    | 1                      | 1    | 1    | 1                | 1    | 1    | 2         | 2    | 2    | 3                        | 3    | 3    | 1                                  | 1    | 1    | 2               | 2    | 2    | 1                           | 1    | 1    | 1                    | 1    | 1    | 1 | 1 | 1 |
|              | R2          | 1                  | 1    | 1    | 1                     | 1    | 1    | 1               | 1    | 1    | 1                      | 1    | 1    | 1                | 1    | 1    | 2         | 2    | 2    | 3                        | 3    | 3    | 1                                  | 1    | 1    | 2               | 2    | 2    | 1                           | 1    | 1    | 1                    | 1    | 1    | 1 | 1 | 1 |
| BO 110       | R1          | 1                  | 1    | 1    | 1                     | 1    | 1    | 3               | 3    | 3    | 1                      | 1    | 1    | 6                | 6    | 6    | 2         | 2    | 2    | 5                        | 5    | 5    | 1                                  | 1    | 1    | 4               | 4    | 4    | 1                           | 1    | 1    | 1                    | 1    | 1    | 1 | 1 | 1 |
|              | R2          | 1                  | 1    | 1    | 1                     | 1    | 1    | 3               | 3    | 3    | 1                      | 1    | 1    | 6                | 6    | 6    | 2         | 2    | 2    | 5                        | 5    | 5    | 1                                  | 1    | 1    | 4               | 4    | 4    | 1                           | 1    | 1    | 1                    | 1    | 1    | 1 | 1 | 1 |
| CoS 88230    | R1          | 2                  | 2    | 2    | 1                     | 1    | 1    | 3               | 3    | 3    | 2                      | 2    | 2    | 1                | 1    | 1    | 3         | 3    | 3    | 3                        | 3    | 3    | 5                                  | 5    | 5    | 2               | 2    | 2    | 1                           | 1    | 1    | 1                    | 1    | 1    | 1 | 1 | 1 |
|              | R2          | 2                  | 2    | 2    | 1                     | 1    | 1    | 3               | 3    | 3    | 2                      | 2    | 2    | 1                | 1    | 1    | 3         | 3    | 3    | 3                        | 3    | 3    | 5                                  | 5    | 5    | 2               | 2    | 2    | 1                           | 1    | 1    | 1                    | 1    | 1    | 1 | 1 | 1 |
| CoS 90269    | R1          | 1                  | 1    | 1    | 1                     | 1    | 1    | 3               | 3    | 3    | 2                      | 2    | 2    | 1                | 1    | 1    | 3         | 3    | 3    | 3                        | 3    | 3    | 5                                  | 5    | 5    | 6               | 6    | 6    | 1                           | 1    | 1    | 1                    | 1    | 1    | 1 | 1 | 1 |
|              | R2          | 1                  | 1    | 1    | 1                     | 1    | 1    | 3               | 3    | 3    | 2                      | 2    | 2    | 1                | 1    | 1    | 3         | 3    | 3    | 3                        | 3    | 3    | 5                                  | 5    | 5    | 6               | 6    | 6    | 1                           | 1    | 1    | 1                    | 1    | 1    | 1 | 1 | 1 |

|            |    |   |   |   |   |   |   |   |   |   |   |   |   |   |   |   |   |   |   |   |   |   |   |   |   |   |   |   |   |   |   |   |   |   |
|------------|----|---|---|---|---|---|---|---|---|---|---|---|---|---|---|---|---|---|---|---|---|---|---|---|---|---|---|---|---|---|---|---|---|---|
| CoS 109    | R1 | 1 | 1 | 1 | 1 | 1 | 1 | 3 | 3 | 3 | 6 | 6 | 6 | 1 | 1 | 1 | 1 | 1 | 1 | 3 | 3 | 3 | 5 | 5 | 5 | 2 | 2 | 2 | 1 | 1 | 1 | 9 | 9 | 9 |
|            | R2 | 1 | 1 | 1 | 1 | 1 | 1 | 3 | 3 | 3 | 6 | 6 | 6 | 1 | 1 | 1 | 1 | 1 | 1 | 3 | 3 | 3 | 5 | 5 | 5 | 2 | 2 | 2 | 1 | 1 | 1 | 9 | 9 | 9 |
| CoSe 01235 | R1 | 1 | 1 | 1 | 1 | 1 | 1 | 3 | 3 | 3 | 1 | 1 | 1 | 1 | 1 | 1 | 2 | 2 | 2 | 3 | 3 | 3 | 1 | 1 | 1 | 5 | 5 | 5 | 1 | 1 | 1 | 9 | 9 | 9 |
|            | R2 | 1 | 1 | 1 | 1 | 1 | 1 | 3 | 3 | 3 | 1 | 1 | 1 | 1 | 1 | 1 | 2 | 2 | 2 | 3 | 3 | 3 | 1 | 1 | 1 | 5 | 5 | 5 | 1 | 1 | 1 | 9 | 9 | 9 |
| CoS 770    | R1 | 1 | 1 | 1 | 3 | 3 | 3 | 3 | 3 | 3 | 2 | 2 | 2 | 4 | 4 | 4 | 2 | 2 | 2 | 3 | 3 | 3 | 5 | 5 | 5 | 2 | 2 | 2 | 1 | 1 | 1 | 9 | 9 | 9 |
|            | R2 | 1 | 1 | 1 | 3 | 3 | 3 | 3 | 3 | 3 | 2 | 2 | 2 | 4 | 4 | 4 | 2 | 2 | 2 | 3 | 3 | 3 | 5 | 5 | 5 | 2 | 2 | 2 | 1 | 1 | 1 | 9 | 9 | 9 |
| CoSe 98231 | R1 | 1 | 1 | 1 | 3 | 3 | 3 | 3 | 3 | 3 | 2 | 2 | 2 | 1 | 1 | 1 | 2 | 2 | 2 | 3 | 3 | 3 | 5 | 5 | 5 | 2 | 2 | 2 | 4 | 4 | 4 | 9 | 9 | 9 |
|            | R2 | 1 | 1 | 1 | 3 | 3 | 3 | 3 | 3 | 3 | 2 | 2 | 2 | 1 | 1 | 1 | 2 | 2 | 2 | 3 | 3 | 3 | 5 | 5 | 5 | 2 | 2 | 2 | 4 | 4 | 4 | 9 | 9 | 9 |
| Co 1148    | R1 | 2 | 2 | 2 | 5 | 5 | 5 | 3 | 3 | 3 | 6 | 6 | 6 | 5 | 5 | 5 | 2 | 2 | 2 | 3 | 3 | 3 | 9 | 9 | 9 | 6 | 6 | 6 | 3 | 3 | 3 | 9 | 9 | 9 |
|            | R2 | 2 | 2 | 2 | 5 | 5 | 5 | 3 | 3 | 3 | 6 | 6 | 6 | 5 | 5 | 5 | 2 | 2 | 2 | 3 | 3 | 3 | 9 | 9 | 9 | 6 | 6 | 6 | 3 | 3 | 3 | 9 | 9 | 9 |
| CoLk 94184 | R1 | 1 | 1 | 1 | 1 | 1 | 1 | 2 | 2 | 2 | 1 | 1 | 1 | 1 | 1 | 1 | 1 | 1 | 1 | 3 | 3 | 3 | 5 | 5 | 5 | 2 | 2 | 2 | 3 | 3 | 3 | 1 | 1 | 1 |
|            | R2 | 1 | 1 | 1 | 1 | 1 | 1 | 2 | 2 | 2 | 1 | 1 | 1 | 1 | 1 | 1 | 1 | 1 | 1 | 3 | 3 | 3 | 5 | 5 | 5 | 2 | 2 | 2 | 3 | 3 | 3 | 1 | 1 | 1 |
| BO 120     | R1 | 1 | 1 | 1 | 1 | 1 | 1 | 1 | 1 | 1 | 2 | 2 | 2 | 6 | 6 | 6 | 2 | 2 | 2 | 3 | 3 | 3 | 5 | 5 | 5 | 6 | 6 | 6 | 1 | 1 | 1 | 9 | 9 | 9 |
|            | R2 | 1 | 1 | 1 | 1 | 1 | 1 | 1 | 1 | 1 | 2 | 2 | 2 | 6 | 6 | 6 | 2 | 2 | 2 | 3 | 3 | 3 | 5 | 5 | 5 | 6 | 6 | 6 | 1 | 1 | 1 | 9 | 9 | 9 |
| CoS 02258  | R1 | 1 | 1 | 1 | 1 | 1 | 1 | 3 | 3 | 3 | 2 | 2 | 2 | 4 | 4 | 4 | 1 | 1 | 1 | 3 | 3 | 3 | 5 | 5 | 5 | 2 | 2 | 2 | 4 | 4 | 4 | 1 | 1 | 1 |
|            | R2 | 1 | 1 | 1 | 1 | 1 | 1 | 3 | 3 | 3 | 2 | 2 | 2 | 4 | 4 | 4 | 1 | 1 | 1 | 3 | 3 | 3 | 5 | 5 | 5 | 2 | 2 | 2 | 4 | 4 | 4 | 1 | 1 | 1 |
| CoB 94164  | R1 | 1 | 1 | 1 | 1 | 1 | 1 | 3 | 3 | 3 | 1 | 1 | 1 | 6 | 6 | 6 | 2 | 2 | 2 | 3 | 3 | 3 | 1 | 1 | 1 | 2 | 2 | 2 | 1 | 1 | 1 | 1 | 1 | 1 |
|            | R2 | 1 | 1 | 1 | 1 | 1 | 1 | 3 | 3 | 3 | 1 | 1 | 1 | 6 | 6 | 6 | 2 | 2 | 2 | 3 | 3 | 3 | 1 | 1 | 1 | 2 | 2 | 2 | 1 | 1 | 1 | 1 | 1 | 1 |
| BO 91      | R1 | 1 | 1 | 1 | 1 | 1 | 1 | 1 | 1 | 1 | 2 | 2 | 2 | 6 | 6 | 6 | 2 | 2 | 2 | 3 | 3 | 3 | 1 | 1 | 1 | 6 | 6 | 6 | 3 | 3 | 3 | 1 | 1 | 1 |
|            | R2 | 1 | 1 | 1 | 1 | 1 | 1 | 1 | 1 | 1 | 2 | 2 | 2 | 6 | 6 | 6 | 2 | 2 | 2 | 3 | 3 | 3 | 1 | 1 | 1 | 6 | 6 | 6 | 3 | 3 | 3 | 1 | 1 | 1 |
| CoS 96268  | R1 | 1 | 1 | 1 | 1 | 1 | 1 | 3 | 3 | 3 | 6 | 6 | 6 | 6 | 6 | 6 | 2 | 2 | 2 | 3 | 3 | 3 | 1 | 1 | 1 | 2 | 2 | 2 | 1 | 1 | 1 | 1 | 1 | 1 |
|            | R2 | 1 | 1 | 1 | 1 | 1 | 1 | 3 | 3 | 3 | 6 | 6 | 6 | 6 | 6 | 6 | 2 | 2 | 2 | 3 | 3 | 3 | 1 | 1 | 1 | 2 | 2 | 2 | 1 | 1 | 1 | 1 | 1 | 1 |
| CoS 94257  | R1 | 1 | 1 | 1 | 1 | 1 | 1 | 3 | 3 | 3 | 2 | 2 | 2 | 1 | 1 | 1 | 2 | 2 | 2 | 3 | 3 | 3 | 1 | 1 | 1 | 2 | 2 | 2 | 1 | 1 | 1 | 1 | 1 | 1 |
|            | R2 | 1 | 1 | 1 | 1 | 1 | 1 | 3 | 3 | 3 | 2 | 2 | 2 | 1 | 1 | 1 | 2 | 2 | 2 | 3 | 3 | 3 | 1 | 1 | 1 | 2 | 2 | 2 | 1 | 1 | 1 | 1 | 1 | 1 |
| CoSe 01424 | R1 | 1 | 1 | 1 | 5 | 5 | 5 | 3 | 3 | 3 | 2 | 2 | 2 | 1 | 1 | 1 | 2 | 2 | 2 | 3 | 3 | 3 | 1 | 1 | 1 | 2 | 2 | 2 | 3 | 3 | 3 | 9 | 9 | 9 |
|            | R2 | 1 | 1 | 1 | 5 | 5 | 5 | 3 | 3 | 3 | 2 | 2 | 2 | 1 | 1 | 1 | 2 | 2 | 2 | 3 | 3 | 3 | 1 | 1 | 1 | 2 | 2 | 2 | 3 | 3 | 3 | 9 | 9 | 9 |
| CoH 110    | R1 | 2 | 2 | 2 | 1 | 1 | 1 | 1 | 1 | 1 | 2 | 2 | 2 | 1 | 1 | 1 | 2 | 2 | 2 | 3 | 3 | 3 | 5 | 5 | 5 | 6 | 6 | 6 | 3 | 3 | 3 | 9 | 9 | 9 |
|            | R2 | 2 | 2 | 2 | 1 | 1 | 1 | 1 | 1 | 1 | 2 | 2 | 2 | 1 | 1 | 1 | 2 | 2 | 2 | 3 | 3 | 3 | 5 | 5 | 5 | 6 | 6 | 6 | 3 | 3 | 3 | 9 | 9 | 9 |
| CoS 797    | R1 | 1 | 1 | 1 | 3 | 3 | 3 | 3 | 3 | 3 | 2 | 2 | 2 | 4 | 4 | 4 | 3 | 3 | 3 | 7 | 7 | 7 | 5 | 5 | 5 | 2 | 2 | 2 | 1 | 1 | 1 | 1 | 1 | 1 |
|            | R2 | 1 | 1 | 1 | 3 | 3 | 3 | 3 | 3 | 3 | 2 | 2 | 2 | 4 | 4 | 4 | 3 | 3 | 3 | 7 | 7 | 7 | 5 | 5 | 5 | 2 | 2 | 2 | 1 | 1 | 1 | 1 | 1 | 1 |
| CoLk 8102  | R1 | 1 | 1 | 1 | 1 | 1 | 1 | 2 | 2 | 2 | 3 | 3 | 3 | 2 | 2 | 2 | 2 | 2 | 2 | 5 | 5 | 5 | 5 | 5 | 5 | 6 | 6 | 6 | 3 | 3 | 3 | 9 | 9 | 9 |
|            | R2 | 1 | 1 | 1 | 1 | 1 | 1 | 2 | 2 | 2 | 3 | 3 | 3 | 2 | 2 | 2 | 2 | 2 | 2 | 5 | 5 | 5 | 5 | 5 | 5 | 6 | 6 | 6 | 3 | 3 | 3 | 9 | 9 | 9 |
| CoS 510    | R1 | 1 | 1 | 1 | 3 | 3 | 3 | 3 | 3 | 3 | 1 | 1 | 1 | 1 | 1 | 1 | 2 | 2 | 2 | 3 | 3 | 3 | 1 | 1 | 1 | 2 | 2 | 2 | 1 | 1 | 1 | 9 | 9 | 9 |
|            | R2 | 1 | 1 | 1 | 3 | 3 | 3 | 3 | 3 | 3 | 1 | 1 | 1 | 1 | 1 | 1 | 2 | 2 | 2 | 3 | 3 | 3 | 1 | 1 | 1 | 2 | 2 | 2 | 1 | 1 | 1 | 9 | 9 | 9 |
| CoS 767    | R1 | 1 | 1 | 1 | 5 | 5 | 5 | 3 | 3 | 3 | 2 | 2 | 2 | 1 | 1 | 1 | 3 | 3 | 3 | 5 | 5 | 5 | 5 | 5 | 5 | 2 | 2 | 2 | 1 | 1 | 1 | 1 | 1 | 1 |
|            | R2 | 1 | 1 | 1 | 5 | 5 | 5 | 3 | 3 | 3 | 2 | 2 | 2 | 1 | 1 | 1 | 3 | 3 | 3 | 5 | 5 | 5 | 5 | 5 | 5 | 2 | 2 | 2 | 1 | 1 | 1 | 1 | 1 | 1 |
| CoS 541    | R1 | 1 | 1 | 1 | 1 | 1 | 1 | 3 | 3 | 3 | 1 | 1 | 1 | 4 | 4 | 4 | 2 | 2 | 2 | 3 | 3 | 3 | 1 | 1 | 1 | 2 | 2 | 2 | 1 | 1 | 1 | 9 | 9 | 9 |
|            | R2 | 1 | 1 | 1 | 1 | 1 | 1 | 3 | 3 | 3 | 1 | 1 | 1 | 4 | 4 | 4 | 2 | 2 | 2 | 3 | 3 | 3 | 1 | 1 | 1 | 2 | 2 | 2 | 1 | 1 | 1 | 9 | 9 | 9 |
| CoS 97258  | R1 | 1 | 1 | 1 | 1 | 1 | 1 | 2 | 2 | 2 | 1 | 1 | 1 | 1 | 1 | 1 | 2 | 2 | 2 | 3 | 3 | 3 | 1 | 1 | 1 | 6 | 6 | 6 | 1 | 1 | 1 | 9 | 9 | 9 |
|            | R2 | 1 | 1 | 1 | 1 | 1 | 1 | 2 | 2 | 2 | 1 | 1 | 1 | 1 | 1 | 1 | 2 | 2 | 2 | 3 | 3 | 3 | 1 | 1 | 1 | 6 | 6 | 6 | 1 | 1 | 1 | 9 | 9 | 9 |
| Co 1158    | R1 | 1 | 1 | 1 | 1 | 1 | 1 | 3 | 3 | 3 | 2 | 2 | 2 | 1 | 1 | 1 | 2 | 2 | 2 | 5 | 5 | 5 | 5 | 5 | 5 | 2 | 2 | 2 | 1 | 1 | 1 | 1 | 1 | 1 |

|              |    |   |   |   |   |   |   |   |   |   |   |   |   |   |   |   |   |   |   |   |   |   |   |   |   |   |   |   |   |   |   |   |   |   |   |
|--------------|----|---|---|---|---|---|---|---|---|---|---|---|---|---|---|---|---|---|---|---|---|---|---|---|---|---|---|---|---|---|---|---|---|---|---|
| CoP 9302     | R2 | 1 | 1 | 1 | 1 | 1 | 1 | 3 | 3 | 3 | 2 | 2 | 2 | 1 | 1 | 1 | 2 | 2 | 2 | 5 | 5 | 5 | 5 | 5 | 5 | 2 | 2 | 2 | 1 | 1 | 1 | 1 | 1 | 1 |   |
|              | R1 | 1 | 1 | 1 | 1 | 1 | 1 | 3 | 3 | 3 | 2 | 2 | 2 | 1 | 1 | 1 | 3 | 3 | 3 | 5 | 5 | 5 | 1 | 1 | 1 | 1 | 1 | 1 | 1 | 1 | 1 | 1 | 1 | 1 |   |
|              | R2 | 1 | 1 | 1 | 1 | 1 | 1 | 3 | 3 | 3 | 2 | 2 | 2 | 1 | 1 | 1 | 3 | 3 | 3 | 5 | 5 | 5 | 1 | 1 | 1 | 1 | 1 | 1 | 1 | 1 | 1 | 1 | 1 | 1 |   |
| CoS 8315     | R1 | 1 | 1 | 1 | 1 | 1 | 1 | 3 | 3 | 3 | 1 | 1 | 1 | 6 | 6 | 6 | 3 | 3 | 3 | 3 | 3 | 3 | 1 | 1 | 1 | 2 | 2 | 2 | 3 | 3 | 3 | 1 | 1 | 1 |   |
|              | R2 | 1 | 1 | 1 | 1 | 1 | 1 | 3 | 3 | 3 | 1 | 1 | 1 | 6 | 6 | 6 | 3 | 3 | 3 | 3 | 3 | 3 | 1 | 1 | 1 | 2 | 2 | 2 | 3 | 3 | 3 | 1 | 1 | 1 |   |
| CoJ 64       | R1 | 1 | 1 | 1 | 3 | 3 | 3 | 3 | 3 | 3 | 1 | 1 | 1 | 1 | 1 | 1 | 3 | 3 | 3 | 3 | 3 | 3 | 9 | 9 | 9 | 2 | 2 | 2 | 1 | 1 | 1 | 1 | 1 | 1 |   |
|              | R2 | 1 | 1 | 1 | 3 | 3 | 3 | 3 | 3 | 3 | 1 | 1 | 1 | 1 | 1 | 1 | 3 | 3 | 3 | 3 | 3 | 3 | 9 | 9 | 9 | 2 | 2 | 2 | 1 | 1 | 1 | 1 | 1 | 1 |   |
| CoS 96258    | R1 | 1 | 1 | 1 | 1 | 1 | 1 | 3 | 3 | 3 | 2 | 2 | 2 | 1 | 1 | 1 | 3 | 3 | 3 | 3 | 3 | 3 | 5 | 5 | 5 | 2 | 2 | 2 | 1 | 1 | 1 | 1 | 9 | 9 | 9 |
|              | R2 | 1 | 1 | 1 | 1 | 1 | 1 | 3 | 3 | 3 | 2 | 2 | 2 | 1 | 1 | 1 | 3 | 3 | 3 | 3 | 3 | 3 | 5 | 5 | 5 | 2 | 2 | 2 | 1 | 1 | 1 | 1 | 9 | 9 | 9 |
| BO 99        | R1 | 1 | 1 | 1 | 1 | 1 | 1 | 3 | 3 | 3 | 1 | 1 | 1 | 6 | 6 | 6 | 2 | 2 | 2 | 5 | 5 | 5 | 1 | 1 | 1 | 6 | 6 | 6 | 1 | 1 | 1 | 9 | 9 | 9 |   |
|              | R2 | 1 | 1 | 1 | 1 | 1 | 1 | 3 | 3 | 3 | 1 | 1 | 1 | 6 | 6 | 6 | 2 | 2 | 2 | 5 | 5 | 5 | 1 | 1 | 1 | 6 | 6 | 6 | 1 | 1 | 1 | 9 | 9 | 9 |   |
| Co 6811      | R1 | 1 | 1 | 1 | 1 | 1 | 1 | 2 | 2 | 2 | 2 | 2 | 2 | 6 | 6 | 6 | 2 | 2 | 2 | 7 | 7 | 7 | 1 | 1 | 1 | 2 | 2 | 2 | 1 | 1 | 1 | 9 | 9 | 9 |   |
|              | R2 | 1 | 1 | 1 | 1 | 1 | 1 | 2 | 2 | 2 | 2 | 2 | 2 | 6 | 6 | 6 | 2 | 2 | 2 | 7 | 7 | 7 | 1 | 1 | 1 | 2 | 2 | 2 | 1 | 1 | 1 | 9 | 9 | 9 |   |
| CoLk 8001    | R1 | 1 | 1 | 1 | 1 | 1 | 1 | 1 | 1 | 1 | 2 | 2 | 2 | 1 | 1 | 1 | 2 | 2 | 2 | 3 | 3 | 3 | 9 | 9 | 9 | 2 | 2 | 2 | 1 | 1 | 1 | 1 | 1 | 1 |   |
|              | R2 | 1 | 1 | 1 | 1 | 1 | 1 | 1 | 1 | 1 | 2 | 2 | 2 | 1 | 1 | 1 | 2 | 2 | 2 | 3 | 3 | 3 | 9 | 9 | 9 | 2 | 2 | 2 | 1 | 1 | 1 | 1 | 1 | 1 |   |
| CoS 02264    | R1 | 1 | 1 | 1 | 1 | 1 | 1 | 3 | 3 | 3 | 1 | 1 | 1 | 1 | 1 | 1 | 2 | 2 | 2 | 5 | 5 | 5 | 5 | 5 | 5 | 6 | 6 | 6 | 1 | 1 | 1 | 9 | 9 | 9 |   |
|              | R2 | 1 | 1 | 1 | 1 | 1 | 1 | 3 | 3 | 3 | 1 | 1 | 1 | 1 | 1 | 1 | 2 | 2 | 2 | 5 | 5 | 5 | 5 | 5 | 5 | 6 | 6 | 6 | 1 | 1 | 1 | 9 | 9 | 9 |   |
| CoPant 90223 | R1 | 1 | 1 | 1 | 3 | 3 | 3 | 3 | 3 | 3 | 1 | 1 | 1 | 6 | 6 | 6 | 2 | 2 | 2 | 3 | 3 | 3 | 1 | 1 | 1 | 2 | 2 | 2 | 3 | 3 | 3 | 9 | 9 | 9 |   |
|              | R2 | 1 | 1 | 1 | 3 | 3 | 3 | 3 | 3 | 3 | 1 | 1 | 1 | 6 | 6 | 6 | 2 | 2 | 2 | 3 | 3 | 3 | 1 | 1 | 1 | 2 | 2 | 2 | 3 | 3 | 3 | 9 | 9 | 9 |   |
| CoSe 95422   | R1 | 1 | 1 | 1 | 1 | 1 | 1 | 3 | 3 | 3 | 1 | 1 | 1 | 2 | 2 | 2 | 2 | 2 | 2 | 5 | 5 | 5 | 9 | 9 | 9 | 6 | 6 | 6 | 3 | 3 | 3 | 1 | 1 | 1 |   |
|              | R2 | 1 | 1 | 1 | 1 | 1 | 1 | 3 | 3 | 3 | 1 | 1 | 1 | 2 | 2 | 2 | 2 | 2 | 2 | 5 | 5 | 5 | 9 | 9 | 9 | 6 | 6 | 6 | 3 | 3 | 3 | 1 | 1 | 1 |   |
| CoS 8436     | R1 | 1 | 1 | 1 | 1 | 1 | 1 | 2 | 2 | 2 | 1 | 1 | 1 | 1 | 1 | 1 | 2 | 2 | 2 | 5 | 5 | 5 | 1 | 1 | 1 | 2 | 2 | 2 | 1 | 1 | 1 | 9 | 9 | 9 |   |
|              | R2 | 1 | 1 | 1 | 1 | 1 | 1 | 2 | 2 | 2 | 1 | 1 | 1 | 1 | 1 | 1 | 2 | 2 | 2 | 5 | 5 | 5 | 1 | 1 | 1 | 2 | 2 | 2 | 1 | 1 | 1 | 9 | 9 | 9 |   |
| UP 9530      | R1 | 1 | 1 | 1 | 1 | 1 | 1 | 3 | 3 | 3 | 2 | 2 | 2 | 6 | 6 | 6 | 2 | 2 | 2 | 3 | 3 | 3 | 1 | 1 | 1 | 2 | 2 | 2 | 1 | 1 | 1 | 1 | 1 | 1 |   |
|              | R2 | 1 | 1 | 1 | 1 | 1 | 1 | 3 | 3 | 3 | 2 | 2 | 2 | 6 | 6 | 6 | 2 | 2 | 2 | 3 | 3 | 3 | 1 | 1 | 1 | 2 | 2 | 2 | 1 | 1 | 1 | 1 | 1 | 1 |   |
| Co 87263     | R1 | 2 | 2 | 2 | 5 | 5 | 5 | 3 | 3 | 3 | 6 | 6 | 6 | 6 | 6 | 6 | 2 | 2 | 2 | 3 | 3 | 3 | 2 | 2 | 2 | 5 | 5 | 5 | 4 | 4 | 4 | 1 | 1 | 1 |   |
|              | R2 | 2 | 2 | 2 | 5 | 5 | 5 | 3 | 3 | 3 | 6 | 6 | 6 | 6 | 6 | 6 | 2 | 2 | 2 | 3 | 3 | 3 | 2 | 2 | 2 | 5 | 5 | 5 | 4 | 4 | 4 | 1 | 1 | 1 |   |
| BO 136       | R1 | 1 | 1 | 1 | 3 | 3 | 3 | 3 | 3 | 3 | 2 | 2 | 2 | 1 | 1 | 1 | 2 | 2 | 2 | 5 | 5 | 5 | 9 | 9 | 9 | 6 | 6 | 6 | 1 | 1 | 1 | 9 | 9 | 9 |   |
|              | R2 | 1 | 1 | 1 | 3 | 3 | 3 | 3 | 3 | 3 | 2 | 2 | 2 | 1 | 1 | 1 | 2 | 2 | 2 | 5 | 5 | 5 | 9 | 9 | 9 | 6 | 6 | 6 | 1 | 1 | 1 | 9 | 9 | 9 |   |
| Co 89003     | R1 | 1 | 1 | 1 | 1 | 1 | 1 | 2 | 2 | 2 | 1 | 1 | 1 | 1 | 1 | 1 | 2 | 2 | 2 | 3 | 3 | 3 | 5 | 5 | 5 | 5 | 5 | 5 | 3 | 3 | 3 | 1 | 1 | 1 |   |
|              | R2 | 1 | 1 | 1 | 1 | 1 | 1 | 2 | 2 | 2 | 1 | 1 | 1 | 1 | 1 | 1 | 2 | 2 | 2 | 3 | 3 | 3 | 5 | 5 | 5 | 5 | 5 | 5 | 3 | 3 | 3 | 1 | 1 | 1 |   |
| CoJ 85       | R1 | 2 | 2 | 2 | 1 | 1 | 1 | 1 | 1 | 1 | 2 | 2 | 2 | 6 | 6 | 6 | 2 | 2 | 2 | 3 | 3 | 3 | 9 | 9 | 9 | 6 | 6 | 6 | 2 | 2 | 2 | 1 | 1 | 1 |   |
|              | R2 | 2 | 2 | 2 | 1 | 1 | 1 | 1 | 1 | 1 | 2 | 2 | 2 | 6 | 6 | 6 | 2 | 2 | 2 | 3 | 3 | 3 | 9 | 9 | 9 | 6 | 6 | 6 | 2 | 2 | 2 | 1 | 1 | 1 |   |
| CoS 91230    | R1 | 1 | 1 | 1 | 1 | 1 | 1 | 3 | 3 | 3 | 1 | 1 | 1 | 6 | 6 | 6 | 2 | 2 | 2 | 5 | 5 | 5 | 1 | 1 | 1 | 2 | 2 | 2 | 1 | 1 | 1 | 1 | 1 | 1 |   |
|              | R2 | 1 | 1 | 1 | 1 | 1 | 1 | 3 | 3 | 3 | 1 | 1 | 1 | 6 | 6 | 6 | 2 | 2 | 2 | 5 | 5 | 5 | 1 | 1 | 1 | 2 | 2 | 2 | 1 | 1 | 1 | 1 | 1 | 1 |   |
| BO 130       | R1 | 1 | 1 | 1 | 1 | 1 | 1 | 3 | 3 | 3 | 1 | 1 | 1 | 6 | 6 | 6 | 3 | 3 | 3 | 3 | 3 | 3 | 9 | 9 | 9 | 6 | 6 | 6 | 3 | 3 | 3 | 9 | 9 | 9 |   |
|              | R2 | 1 | 1 | 1 | 1 | 1 | 1 | 3 | 3 | 3 | 1 | 1 | 1 | 6 | 6 | 6 | 3 | 3 | 3 | 3 | 3 | 3 | 9 | 9 | 9 | 6 | 6 | 6 | 3 | 3 | 3 | 9 | 9 | 9 |   |
| BO 138       | R1 | 1 | 1 | 1 | 1 | 1 | 1 | 1 | 1 | 1 | 2 | 2 | 2 | 1 | 1 | 1 | 2 | 2 | 2 | 3 | 3 | 3 | 9 | 9 | 9 | 2 | 2 | 2 | 1 | 1 | 1 | 9 | 9 | 9 |   |
|              | R2 | 1 | 1 | 1 | 1 | 1 | 1 | 1 | 1 | 1 | 2 | 2 | 2 | 1 | 1 | 1 | 2 | 2 | 2 | 3 | 3 | 3 | 9 | 9 | 9 | 2 | 2 | 2 | 1 | 1 | 1 | 9 | 9 | 9 |   |
| CoS 443      | R1 | 1 | 1 | 1 | 1 | 1 | 1 | 3 | 3 | 3 | 2 | 2 | 2 | 4 | 4 | 4 | 2 | 2 | 2 | 3 | 3 | 3 | 9 | 9 | 9 | 2 | 2 | 2 | 1 | 1 | 1 | 1 | 1 | 1 |   |
|              | R2 | 1 | 1 | 1 | 1 | 1 | 1 | 3 | 3 | 3 | 2 | 2 | 2 | 4 | 4 | 4 | 2 | 2 | 2 | 3 | 3 | 3 | 9 | 9 | 9 | 2 | 2 | 2 | 1 | 1 | 1 | 1 | 1 | 1 |   |

|              |    |   |   |   |   |   |   |   |   |   |   |   |   |   |   |   |   |   |   |   |   |   |   |   |   |   |   |   |   |   |   |   |   |   |
|--------------|----|---|---|---|---|---|---|---|---|---|---|---|---|---|---|---|---|---|---|---|---|---|---|---|---|---|---|---|---|---|---|---|---|---|
| BO 109       | R1 | 2 | 2 | 2 | 3 | 3 | 3 | 3 | 3 | 3 | 2 | 2 | 2 | 6 | 6 | 6 | 2 | 2 | 2 | 5 | 5 | 5 | 5 | 5 | 5 | 6 | 6 | 6 | 3 | 3 | 3 | 9 | 9 | 9 |
|              | R2 | 2 | 2 | 2 | 3 | 3 | 3 | 3 | 3 | 3 | 2 | 2 | 2 | 6 | 6 | 6 | 2 | 2 | 2 | 5 | 5 | 5 | 5 | 5 | 5 | 6 | 6 | 6 | 3 | 3 | 3 | 9 | 9 | 9 |
| BO 129       | R1 | 1 | 1 | 1 | 1 | 1 | 1 | 3 | 3 | 3 | 2 | 2 | 2 | 6 | 6 | 6 | 2 | 2 | 2 | 5 | 5 | 5 | 5 | 5 | 5 | 2 | 2 | 2 | 1 | 1 | 1 | 1 | 1 | 1 |
|              | R2 | 1 | 1 | 1 | 1 | 1 | 1 | 3 | 3 | 3 | 2 | 2 | 2 | 6 | 6 | 6 | 2 | 2 | 2 | 5 | 5 | 5 | 5 | 5 | 5 | 2 | 2 | 2 | 1 | 1 | 1 | 1 | 1 | 1 |
| Co 6425      | R1 | 1 | 1 | 1 | 1 | 1 | 1 | 3 | 3 | 3 | 1 | 1 | 1 | 2 | 2 | 2 | 2 | 2 | 2 | 3 | 3 | 3 | 5 | 5 | 5 | 2 | 2 | 2 | 3 | 3 | 3 | 1 | 1 | 1 |
|              | R2 | 1 | 1 | 1 | 1 | 1 | 1 | 3 | 3 | 3 | 1 | 1 | 1 | 2 | 2 | 2 | 2 | 2 | 2 | 3 | 3 | 3 | 5 | 5 | 5 | 2 | 2 | 2 | 3 | 3 | 3 | 1 | 1 | 1 |
| Co 1336      | R1 | 1 | 1 | 1 | 1 | 1 | 1 | 3 | 3 | 3 | 2 | 2 | 2 | 1 | 1 | 1 | 1 | 1 | 1 | 5 | 5 | 5 | 5 | 5 | 5 | 6 | 6 | 6 | 1 | 1 | 1 | 1 | 1 | 1 |
|              | R2 | 1 | 1 | 1 | 1 | 1 | 1 | 3 | 3 | 3 | 2 | 2 | 2 | 1 | 1 | 1 | 1 | 1 | 1 | 5 | 5 | 5 | 5 | 5 | 5 | 6 | 6 | 6 | 1 | 1 | 1 | 1 | 1 | 1 |
| CoP 9702     | R1 | 2 | 2 | 2 | 1 | 1 | 1 | 3 | 3 | 3 | 2 | 2 | 2 | 1 | 1 | 1 | 1 | 3 | 3 | 3 | 5 | 5 | 5 | 1 | 1 | 1 | 2 | 2 | 2 | 1 | 1 | 1 | 1 | 1 |
|              | R2 | 2 | 2 | 2 | 1 | 1 | 1 | 3 | 3 | 3 | 2 | 2 | 2 | 1 | 1 | 1 | 1 | 3 | 3 | 3 | 5 | 5 | 5 | 1 | 1 | 1 | 2 | 2 | 2 | 1 | 1 | 1 | 1 | 1 |
| CoP 9301     | R1 | 1 | 1 | 1 | 3 | 3 | 3 | 3 | 3 | 3 | 1 | 1 | 1 | 1 | 1 | 1 | 2 | 2 | 2 | 5 | 5 | 5 | 1 | 1 | 1 | 6 | 6 | 6 | 3 | 3 | 3 | 9 | 9 | 9 |
|              | R2 | 1 | 1 | 1 | 3 | 3 | 3 | 3 | 3 | 3 | 1 | 1 | 1 | 1 | 1 | 1 | 2 | 2 | 2 | 5 | 5 | 5 | 1 | 1 | 1 | 6 | 6 | 6 | 3 | 3 | 3 | 9 | 9 | 9 |
| Co 89029     | R1 | 1 | 1 | 1 | 3 | 3 | 3 | 2 | 2 | 2 | 1 | 1 | 1 | 6 | 6 | 6 | 2 | 2 | 2 | 3 | 3 | 3 | 5 | 5 | 5 | 2 | 2 | 2 | 3 | 3 | 3 | 9 | 9 | 9 |
|              | R2 | 1 | 1 | 1 | 3 | 3 | 3 | 2 | 2 | 2 | 1 | 1 | 1 | 6 | 6 | 6 | 2 | 2 | 2 | 3 | 3 | 3 | 5 | 5 | 5 | 2 | 2 | 2 | 3 | 3 | 3 | 9 | 9 | 9 |
| CoS 8432     | R1 | 1 | 1 | 1 | 1 | 1 | 1 | 3 | 3 | 3 | 1 | 1 | 1 | 1 | 1 | 1 | 2 | 2 | 2 | 3 | 3 | 3 | 9 | 9 | 9 | 2 | 2 | 2 | 1 | 1 | 1 | 1 | 1 | 1 |
|              | R2 | 1 | 1 | 1 | 1 | 1 | 1 | 3 | 3 | 3 | 1 | 1 | 1 | 1 | 1 | 1 | 2 | 2 | 2 | 3 | 3 | 3 | 9 | 9 | 9 | 2 | 2 | 2 | 1 | 1 | 1 | 1 | 1 | 1 |
| CoH 35       | R1 | 2 | 2 | 2 | 1 | 1 | 1 | 2 | 2 | 2 | 2 | 2 | 2 | 1 | 1 | 1 | 2 | 2 | 2 | 5 | 5 | 5 | 4 | 4 | 4 | 2 | 2 | 2 | 2 | 2 | 2 | 1 | 1 | 1 |
|              | R2 | 2 | 2 | 2 | 1 | 1 | 1 | 2 | 2 | 2 | 2 | 2 | 2 | 1 | 1 | 1 | 2 | 2 | 2 | 5 | 5 | 5 | 4 | 4 | 4 | 2 | 2 | 2 | 2 | 2 | 2 | 1 | 1 | 1 |
| CoPant 84212 | R1 | 1 | 1 | 1 | 1 | 1 | 1 | 3 | 3 | 3 | 2 | 2 | 2 | 1 | 1 | 1 | 2 | 2 | 2 | 3 | 3 | 3 | 5 | 5 | 5 | 2 | 2 | 2 | 1 | 1 | 1 | 1 | 1 | 1 |
|              | R2 | 1 | 1 | 1 | 1 | 1 | 1 | 3 | 3 | 3 | 2 | 2 | 2 | 1 | 1 | 1 | 2 | 2 | 2 | 3 | 3 | 3 | 5 | 5 | 5 | 2 | 2 | 2 | 1 | 1 | 1 | 1 | 1 | 1 |
| CoJ 88       | R1 | 1 | 1 | 1 | 1 | 1 | 1 | 3 | 3 | 3 | 2 | 2 | 2 | 1 | 1 | 1 | 3 | 3 | 3 | 3 | 3 | 3 | 9 | 9 | 9 | 2 | 2 | 2 | 1 | 1 | 1 | 1 | 1 | 1 |
|              | R2 | 1 | 1 | 1 | 1 | 1 | 1 | 3 | 3 | 3 | 2 | 2 | 2 | 1 | 1 | 1 | 3 | 3 | 3 | 3 | 3 | 3 | 9 | 9 | 9 | 2 | 2 | 2 | 1 | 1 | 1 | 1 | 1 | 1 |
| CoS 245      | R1 | 1 | 1 | 1 | 1 | 1 | 1 | 3 | 3 | 3 | 1 | 1 | 1 | 1 | 1 | 1 | 2 | 2 | 2 | 3 | 3 | 3 | 5 | 5 | 5 | 2 | 2 | 2 | 1 | 1 | 1 | 1 | 1 | 1 |
|              | R2 | 1 | 1 | 1 | 1 | 1 | 1 | 3 | 3 | 3 | 1 | 1 | 1 | 1 | 1 | 1 | 2 | 2 | 2 | 3 | 3 | 3 | 5 | 5 | 5 | 2 | 2 | 2 | 1 | 1 | 1 | 1 | 1 | 1 |
| CoS 90265    | R1 | 1 | 1 | 1 | 1 | 1 | 1 | 3 | 3 | 3 | 1 | 1 | 1 | 6 | 6 | 6 | 2 | 2 | 2 | 3 | 3 | 3 | 1 | 1 | 1 | 6 | 6 | 6 | 3 | 3 | 3 | 9 | 9 | 9 |
|              | R2 | 1 | 1 | 1 | 1 | 1 | 1 | 3 | 3 | 3 | 1 | 1 | 1 | 6 | 6 | 6 | 2 | 2 | 2 | 3 | 3 | 3 | 1 | 1 | 1 | 6 | 6 | 6 | 3 | 3 | 3 | 9 | 9 | 9 |
| BO 137       | R1 | 1 | 1 | 1 | 1 | 1 | 1 | 3 | 3 | 3 | 1 | 1 | 1 | 1 | 1 | 1 | 3 | 3 | 3 | 3 | 3 | 3 | 1 | 1 | 1 | 2 | 2 | 2 | 3 | 3 | 3 | 1 | 1 | 1 |
|              | R2 | 1 | 1 | 1 | 1 | 1 | 1 | 3 | 3 | 3 | 1 | 1 | 1 | 1 | 1 | 1 | 3 | 3 | 3 | 3 | 3 | 3 | 1 | 1 | 1 | 2 | 2 | 2 | 3 | 3 | 3 | 1 | 1 | 1 |
| CoS 95222    | R1 | 1 | 1 | 1 | 1 | 1 | 1 | 3 | 3 | 3 | 1 | 1 | 1 | 1 | 1 | 1 | 2 | 2 | 2 | 7 | 7 | 7 | 1 | 1 | 1 | 2 | 2 | 2 | 1 | 1 | 1 | 1 | 1 | 1 |
|              | R2 | 1 | 1 | 1 | 1 | 1 | 1 | 3 | 3 | 3 | 1 | 1 | 1 | 1 | 1 | 1 | 2 | 2 | 2 | 7 | 7 | 7 | 1 | 1 | 1 | 2 | 2 | 2 | 1 | 1 | 1 | 1 | 1 | 1 |
| CoS 95270    | R1 | 1 | 1 | 1 | 1 | 1 | 1 | 3 | 3 | 3 | 1 | 1 | 1 | 1 | 1 | 1 | 2 | 2 | 2 | 3 | 3 | 3 | 5 | 5 | 5 | 2 | 2 | 2 | 1 | 1 | 1 | 1 | 1 | 1 |
|              | R2 | 1 | 1 | 1 | 1 | 1 | 1 | 3 | 3 | 3 | 1 | 1 | 1 | 1 | 1 | 1 | 2 | 2 | 2 | 3 | 3 | 3 | 5 | 5 | 5 | 2 | 2 | 2 | 1 | 1 | 1 | 1 | 1 | 1 |
| Co 419       | R1 | 2 | 2 | 2 | 5 | 5 | 5 | 3 | 3 | 3 | 6 | 6 | 6 | 6 | 6 | 6 | 2 | 2 | 2 | 3 | 3 | 3 | 5 | 5 | 5 | 5 | 5 | 5 | 2 | 2 | 2 | 9 | 9 | 9 |
|              | R2 | 2 | 2 | 2 | 5 | 5 | 5 | 3 | 3 | 3 | 6 | 6 | 6 | 6 | 6 | 6 | 2 | 2 | 2 | 3 | 3 | 3 | 5 | 5 | 5 | 5 | 5 | 5 | 2 | 2 | 2 | 9 | 9 | 9 |
| CoP 9206     | R1 | 2 | 2 | 2 | 3 | 3 | 3 | 3 | 3 | 3 | 1 | 1 | 1 | 2 | 2 | 2 | 2 | 2 | 2 | 5 | 5 | 5 | 1 | 1 | 1 | 2 | 2 | 2 | 1 | 1 | 1 | 9 | 9 | 9 |
|              | R2 | 2 | 2 | 2 | 3 | 3 | 3 | 3 | 3 | 3 | 1 | 1 | 1 | 2 | 2 | 2 | 2 | 2 | 2 | 5 | 5 | 5 | 1 | 1 | 1 | 2 | 2 | 2 | 1 | 1 | 1 | 9 | 9 | 9 |
| CoH 56       | R1 | 1 | 1 | 1 | 5 | 5 | 5 | 3 | 3 | 3 | 2 | 2 | 2 | 1 | 1 | 1 | 2 | 2 | 2 | 5 | 5 | 5 | 9 | 9 | 9 | 6 | 6 | 6 | 1 | 1 | 1 | 1 | 1 | 1 |
|              | R2 | 1 | 1 | 1 | 5 | 5 | 5 | 3 | 3 | 3 | 2 | 2 | 2 | 1 | 1 | 1 | 2 | 2 | 2 | 5 | 5 | 5 | 9 | 9 | 9 | 6 | 6 | 6 | 1 | 1 | 1 | 1 | 1 | 1 |
| CoH 99       | R1 | 1 | 1 | 1 | 1 | 1 | 1 | 3 | 3 | 3 | 2 | 2 | 2 | 1 | 1 | 1 | 3 | 3 | 3 | 3 | 3 | 3 | 9 | 9 | 9 | 2 | 2 | 2 | 1 | 1 | 1 | 9 | 9 | 9 |
|              | R2 | 1 | 1 | 1 | 1 | 1 | 1 | 3 | 3 | 3 |   |   |   | 1 | 1 | 1 | 3 | 3 | 3 | 3 | 3 | 3 | 9 | 9 | 9 | 2 | 2 | 2 | 1 | 1 | 1 | 9 | 9 | 9 |
| CoPant 97222 | R1 | 1 | 1 | 1 | 1 | 1 | 1 | 1 | 1 | 1 | 1 | 1 | 1 | 6 | 6 | 6 | 2 | 2 | 2 | 3 | 3 | 3 | 5 | 5 | 5 | 6 | 6 | 6 | 1 | 1 | 1 | 9 | 9 | 9 |

|            |    |   |   |   |   |   |   |   |   |   |   |   |   |   |   |   |   |   |   |   |   |   |   |   |   |   |   |   |   |   |   |   |   |   |   |
|------------|----|---|---|---|---|---|---|---|---|---|---|---|---|---|---|---|---|---|---|---|---|---|---|---|---|---|---|---|---|---|---|---|---|---|---|
|            | R2 | 1 | 1 | 1 | 1 | 1 | 1 | 1 | 1 | 1 | 1 | 1 | 1 | 1 | 6 | 6 | 6 | 2 | 2 | 2 | 3 | 3 | 3 | 5 | 5 | 5 | 6 | 6 | 6 | 1 | 1 | 1 | 9 | 9 | 9 |
| CoS 687    | R1 | 2 | 2 | 2 | 3 | 3 | 3 | 3 | 3 | 3 | 1 | 1 | 1 | 1 | 1 | 1 | 1 | 2 | 2 | 2 | 3 | 3 | 3 | 5 | 5 | 5 | 6 | 6 | 6 | 1 | 1 | 1 | 1 | 1 | 1 |
|            | R2 | 2 | 2 | 2 | 3 | 3 | 3 | 3 | 3 | 3 | 1 | 1 | 1 | 1 | 1 | 1 | 1 | 2 | 2 | 2 | 3 | 3 | 3 | 5 | 5 | 5 | 6 | 6 | 6 | 1 | 1 | 1 | 1 | 1 | 1 |
| CoS 91269  | R1 | 1 | 1 | 1 | 1 | 1 | 1 | 3 | 3 | 3 | 1 | 1 | 1 | 6 | 6 | 6 | 2 | 2 | 2 | 7 | 7 | 7 | 5 | 5 | 5 | 2 | 2 | 2 | 3 | 3 | 3 | 1 | 1 | 1 |   |
|            | R2 | 1 | 1 | 1 | 1 | 1 | 1 | 3 | 3 | 3 | 1 | 1 | 1 | 6 | 6 | 6 | 2 | 2 | 2 | 7 | 7 | 7 | 5 | 5 | 5 | 2 | 2 | 2 | 3 | 3 | 3 | 1 | 1 | 1 |   |
| CoS 8207   | R1 | 2 | 2 | 2 | 3 | 3 | 3 | 3 | 3 | 3 | 1 | 1 | 1 | 1 | 1 | 1 | 1 | 3 | 3 | 3 | 5 | 5 | 5 | 5 | 5 | 5 | 2 | 2 | 2 | 1 | 1 | 1 | 9 | 9 | 9 |
|            | R2 | 2 | 2 | 2 | 3 | 3 | 3 | 3 | 3 | 3 | 1 | 1 | 1 | 1 | 1 | 1 | 1 | 3 | 3 | 3 | 5 | 5 | 5 | 5 | 5 | 5 | 2 | 2 | 2 | 1 | 1 | 1 | 9 | 9 | 9 |
| CoS 01256  | R1 | 1 | 1 | 1 | 3 | 3 | 3 | 1 | 1 | 1 | 2 | 2 | 2 | 1 | 1 | 1 | 1 | 2 | 2 | 2 | 3 | 3 | 3 | 1 | 1 | 1 | 6 | 6 | 6 | 3 | 3 | 3 | 9 | 9 | 9 |
|            | R2 | 1 | 1 | 1 | 3 | 3 | 3 | 1 | 1 | 1 | 2 | 2 | 2 | 1 | 1 | 1 | 1 | 2 | 2 | 2 | 3 | 3 | 3 | 1 | 1 | 1 | 6 | 6 | 6 | 3 | 3 | 3 | 9 | 9 | 9 |
| CoS 94270  | R1 | 1 | 1 | 1 | 1 | 1 | 1 | 3 | 3 | 3 | 2 | 2 | 2 | 6 | 6 | 6 | 3 | 3 | 3 | 3 | 3 | 3 | 5 | 5 | 5 | 2 | 2 | 2 | 1 | 1 | 1 | 1 | 1 | 1 |   |
|            | R2 | 1 | 1 | 1 | 1 | 1 | 1 | 3 | 3 | 3 | 2 | 2 | 2 | 6 | 6 | 6 | 3 | 3 | 3 | 3 | 3 | 3 | 5 | 5 | 5 | 2 | 2 | 2 | 1 | 1 | 1 | 1 | 1 | 1 |   |
| CoS 96269  | R1 | 1 | 1 | 1 | 1 | 1 | 1 | 3 | 3 | 3 | 1 | 1 | 1 | 4 | 4 | 4 | 3 | 3 | 3 | 3 | 3 | 3 | 9 | 9 | 9 | 2 | 2 | 2 | 1 | 1 | 1 | 1 | 1 | 1 |   |
|            | R2 | 1 | 1 | 1 | 1 | 1 | 1 | 3 | 3 | 3 | 1 | 1 | 1 | 4 | 4 | 4 | 3 | 3 | 3 | 3 | 3 | 3 | 9 | 9 | 9 | 2 | 2 | 2 | 1 | 1 | 1 | 1 | 1 | 1 |   |
| CoS 96275  | R1 | 2 | 2 | 2 | 1 | 1 | 1 | 3 | 3 | 3 | 1 | 1 | 1 | 6 | 6 | 6 | 3 | 3 | 3 | 3 | 3 | 3 | 1 | 1 | 1 | 2 | 2 | 2 | 1 | 1 | 1 | 9 | 9 | 9 |   |
|            | R2 | 2 | 2 | 2 | 1 | 1 | 1 | 3 | 3 | 3 | 1 | 1 | 1 | 6 | 6 | 6 | 3 | 3 | 3 | 3 | 3 | 3 | 1 | 1 | 1 | 2 | 2 | 2 | 1 | 1 | 1 | 9 | 9 | 9 |   |
| CoS 99259  | R1 | 1 | 1 | 1 | 1 | 1 | 1 | 3 | 3 | 3 | 2 | 2 | 2 | 1 | 1 | 1 | 2 | 2 | 2 | 3 | 3 | 3 | 5 | 5 | 5 | 2 | 2 | 2 | 1 | 1 | 1 | 1 | 1 | 1 |   |
|            | R2 | 1 | 1 | 1 | 1 | 1 | 1 | 3 | 3 | 3 | 2 | 2 | 2 | 1 | 1 | 1 | 2 | 2 | 2 | 3 | 3 | 3 | 5 | 5 | 5 | 2 | 2 | 2 | 1 | 1 | 1 | 1 | 1 | 1 |   |
| CoSe 00235 | R1 | 1 | 1 | 1 | 3 | 3 | 3 | 3 | 3 | 3 | 1 | 1 | 1 | 1 | 1 | 1 | 2 | 2 | 2 | 3 | 3 | 3 | 1 | 1 | 1 | 2 | 2 | 2 | 1 | 1 | 1 | 9 | 9 | 9 |   |
|            | R2 | 1 | 1 | 1 | 3 | 3 | 3 | 3 | 3 | 3 | 1 | 1 | 1 | 1 | 1 | 1 | 2 | 2 | 2 | 3 | 3 | 3 | 1 | 1 | 1 | 2 | 2 | 2 | 1 | 1 | 1 | 9 | 9 | 9 |   |
| UP 0097    | R1 | 2 | 2 | 2 | 1 | 1 | 1 | 2 | 2 | 2 | 1 | 1 | 1 | 1 | 1 | 1 | 2 | 2 | 2 | 3 | 3 | 3 | 4 | 4 | 4 | 2 | 2 | 2 | 1 | 1 | 1 | 9 | 9 | 9 |   |
|            | R2 | 2 | 2 | 2 | 1 | 1 | 1 | 2 | 2 | 2 | 1 | 1 | 1 | 1 | 1 | 1 | 2 | 2 | 2 | 3 | 3 | 3 | 4 | 4 | 4 | 2 | 2 | 2 | 1 | 1 | 1 | 9 | 9 | 9 |   |
| UP 05      | R1 | 1 | 1 | 1 | 1 | 1 | 1 | 3 | 3 | 3 | 2 | 2 | 2 | 1 | 1 | 1 | 1 | 1 | 1 | 5 | 5 | 5 | 5 | 5 | 5 | 2 | 2 | 2 | 3 | 3 | 3 | 1 | 1 | 1 |   |
|            | R2 | 1 | 1 | 1 | 1 | 1 | 1 | 3 | 3 | 3 | 2 | 2 | 2 | 1 | 1 | 1 | 1 | 1 | 1 | 5 | 5 | 5 | 5 | 5 | 5 | 2 | 2 | 2 | 3 | 3 | 3 | 1 | 1 | 1 |   |
| CoS 97261  | R1 | 1 | 1 | 1 | 3 | 3 | 3 | 3 | 3 | 3 | 1 | 1 | 1 | 1 | 1 | 1 | 2 | 2 | 2 | 5 | 5 | 5 | 5 | 5 | 5 | 2 | 2 | 2 | 1 | 1 | 1 | 1 | 1 | 1 |   |
|            | R2 | 1 | 1 | 1 | 3 | 3 | 3 | 3 | 3 | 3 | 1 | 1 | 1 | 1 | 1 | 1 | 2 | 2 | 2 | 5 | 5 | 5 | 5 | 5 | 5 | 2 | 2 | 2 | 1 | 1 | 1 | 1 | 1 | 1 |   |

Table Continued...

| Variety      | Replication | Rind surface appearance |      |      | Waxiness |      |      | Shape of Bud |      |      | Bud groove |      |      | Bud cushion |      |      | Bud tip in relation to growth ring |      |      | Prominence of growth ring |      |      | Width of root band |      |      | Cross-section |      |      | Pithiness |      |      | Bud size |      |      |
|--------------|-------------|-------------------------|------|------|----------|------|------|--------------|------|------|------------|------|------|-------------|------|------|------------------------------------|------|------|---------------------------|------|------|--------------------|------|------|---------------|------|------|-----------|------|------|----------|------|------|
|              |             | 2012                    | 2013 | 2014 | 2012     | 2013 | 2014 | 2012         | 2013 | 2014 | 2012       | 2013 | 2014 | 2012        | 2013 | 2014 | 2012                               | 2013 | 2014 | 2012                      | 2013 | 2014 | 2012               | 2013 | 2014 | 2012          | 2013 | 2014 | 2012      | 2013 | 2014 | 2012     | 2013 | 2014 |
| CoPant 96219 | R1          | 1                       | 1    | 1    | 7        | 7    | 7    | 3            | 3    | 3    | 1          | 1    | 1    | 9           | 9    | 9    | 3                                  | 3    | 3    | 9                         | 9    | 9    | 5                  | 5    | 5    | 2             | 2    | 2    | 1         | 1    | 1    | 5        | 5    | 5    |
|              | R2          | 1                       | 1    | 1    | 7        | 7    | 7    | 3            | 3    | 3    | 1          | 1    | 1    | 9           | 9    | 9    | 3                                  | 3    | 3    | 9                         | 9    | 9    | 5                  | 5    | 5    | 2             | 2    | 2    | 1         | 1    | 1    | 5        | 5    | 5    |
| CoS 03279    | R1          | 1                       | 1    | 1    | 5        | 5    | 5    | 6            | 6    | 6    | 5          | 5    | 5    | 1           | 1    | 1    | 3                                  | 3    | 3    | 9                         | 9    | 9    | 3                  | 3    | 3    | 1             | 1    | 1    | 1         | 1    | 1    | 5        | 5    | 5    |
|              | R2          | 1                       | 1    | 1    | 5        | 5    | 5    | 6            | 6    | 6    | 5          | 5    | 5    | 1           | 1    | 1    | 3                                  | 3    | 3    | 9                         | 9    | 9    | 3                  | 3    | 3    | 1             | 1    | 1    | 1         | 1    | 1    | 5        | 5    | 5    |
| CoSe 92423   | R1          | 1                       | 1    | 1    | 7        | 7    | 7    | 1            | 1    | 1    | 3          | 3    | 3    | 1           | 1    | 1    | 3                                  | 3    | 3    | 1                         | 1    | 1    | 5                  | 5    | 5    | 1             | 1    | 1    | 9         | 9    | 9    | 5        | 5    | 5    |
|              | R2          | 1                       | 1    | 1    | 7        | 7    | 7    | 1            | 1    | 1    | 3          | 3    | 3    | 1           | 1    | 1    | 3                                  | 3    | 3    | 1                         | 1    | 1    | 5                  | 5    | 5    | 1             | 1    | 1    | 9         | 9    | 9    | 5        | 5    | 5    |
| CoH 92       | R1          | 1                       | 1    | 1    | 5        | 5    | 5    | 4            | 4    | 4    | 1          | 1    | 1    | 1           | 1    | 1    | 1                                  | 1    | 1    | 9                         | 9    | 9    | 3                  | 3    | 3    | 1             | 1    | 1    | 9         | 9    | 9    | 3        | 3    | 3    |
|              | R2          | 1                       | 1    | 1    | 5        | 5    | 5    | 4            | 4    | 4    | 1          | 1    | 1    | 1           | 1    | 1    | 1                                  | 1    | 1    | 9                         | 9    | 9    | 3                  | 3    | 3    | 1             | 1    | 1    | 9         | 9    | 9    | 3        | 3    | 3    |
| CoS 95255    | R1          | 1                       | 1    | 1    | 5        | 5    | 5    | 4            | 4    | 4    | 1          | 1    | 1    | 1           | 1    | 1    | 3                                  | 3    | 3    | 9                         | 9    | 9    | 3                  | 3    | 3    | 2             | 2    | 2    | 1         | 1    | 1    | 5        | 5    | 5    |
|              | R2          | 1                       | 1    | 1    | 5        | 5    | 5    | 4            | 4    | 4    | 1          | 1    | 1    | 1           | 1    | 1    | 3                                  | 3    | 3    | 9                         | 9    | 9    | 3                  | 3    | 3    | 2             | 2    | 2    | 1         | 1    | 1    | 5        | 5    | 5    |
| CoS 97264    | R1          | 1                       | 1    | 1    | 5        | 5    | 5    | 8            | 8    | 8    | 3          | 3    | 3    | 1           | 1    | 1    | 3                                  | 3    | 3    | 1                         | 1    | 1    | 3                  | 3    | 3    | 1             | 1    | 1    | 1         | 1    | 1    | 5        | 5    | 5    |
|              | R2          | 1                       | 1    | 1    | 5        | 5    | 5    | 8            | 8    | 8    | 3          | 3    | 3    | 1           | 1    | 1    | 3                                  | 3    | 3    | 1                         | 1    | 1    | 3                  | 3    | 3    | 1             | 1    | 1    | 1         | 1    | 1    | 5        | 5    | 5    |
| CoSe 96436   | R1          | 1                       | 1    | 1    | 3        | 3    | 3    | 3            | 3    | 3    | 1          | 1    | 1    | 1           | 1    | 1    | 1                                  | 1    | 1    | 1                         | 1    | 1    | 5                  | 5    | 5    | 1             | 1    | 1    | 9         | 9    | 9    | 5        | 5    | 5    |
|              | R2          | 1                       | 1    | 1    | 3        | 3    | 3    | 3            | 3    | 3    | 1          | 1    | 1    | 1           | 1    | 1    | 1                                  | 1    | 1    | 1                         | 1    | 1    | 5                  | 5    | 5    | 1             | 1    | 1    | 9         | 9    | 9    | 5        | 5    | 5    |
| CoJ 89       | R1          | 3                       | 3    | 3    | 5        | 5    | 5    | 4            | 4    | 4    | 1          | 1    | 1    | 9           | 9    | 9    | 1                                  | 1    | 1    | 9                         | 9    | 9    | 5                  | 5    | 5    | 2             | 2    | 2    | 1         | 1    | 1    | 3        | 3    | 3    |
|              | R2          | 3                       | 3    | 3    | 5        | 5    | 5    | 4            | 4    | 4    | 1          | 1    | 1    | 9           | 9    | 9    | 1                                  | 1    | 1    | 9                         | 9    | 9    | 5                  | 5    | 5    | 2             | 2    | 2    | 1         | 1    | 1    | 3        | 3    | 3    |
| CoH 119      | R1          | 4                       | 4    | 4    | 3        | 3    | 3    | 3            | 3    | 3    | 1          | 1    | 1    | 1           | 1    | 1    | 3                                  | 3    | 3    | 1                         | 1    | 1    | 5                  | 5    | 5    | 1             | 1    | 1    | 9         | 9    | 9    | 5        | 5    | 5    |
|              | R2          | 4                       | 4    | 4    | 3        | 3    | 3    | 3            | 3    | 3    | 1          | 1    | 1    | 1           | 1    | 1    | 3                                  | 3    | 3    | 1                         | 1    | 1    | 5                  | 5    | 5    | 1             | 1    | 1    | 9         | 9    | 9    | 5        | 5    | 5    |
| CoSe 95436   | R1          | 1                       | 1    | 1    | 5        | 5    | 5    | 1            | 1    | 1    | 3          | 3    | 3    | 1           | 1    | 1    | 3                                  | 3    | 3    | 9                         | 9    | 9    | 5                  | 5    | 5    | 1             | 1    | 1    | 1         | 1    | 1    | 5        | 5    | 5    |
|              | R2          | 1                       | 1    | 1    | 5        | 5    | 5    | 1            | 1    | 1    | 3          | 3    | 3    | 1           | 1    | 1    | 3                                  | 3    | 3    | 9                         | 9    | 9    | 5                  | 5    | 5    | 1             | 1    | 1    | 1         | 1    | 1    | 5        | 5    | 5    |
| BO 128       | R1          | 1                       | 1    | 1    | 5        | 5    | 5    | 5            | 5    | 5    | 1          | 1    | 1    | 1           | 1    | 1    | 3                                  | 3    | 3    | 1                         | 1    | 1    | 7                  | 7    | 7    | 1             | 1    | 1    | 9         | 9    | 9    | 5        | 5    | 5    |
|              | R2          | 1                       | 1    | 1    | 5        | 5    | 5    | 5            | 5    | 5    | 1          | 1    | 1    | 1           | 1    | 1    | 3                                  | 3    | 3    | 1                         | 1    | 1    | 7                  | 7    | 7    | 1             | 1    | 1    | 9         | 9    | 9    | 5        | 5    | 5    |
| Co 453       | R1          | 2                       | 2    | 2    | 5        | 5    | 5    | 1            | 1    | 1    | 1          | 1    | 1    | 9           | 9    | 9    | 3                                  | 3    | 3    | 9                         | 9    | 9    | 5                  | 5    | 5    | 1             | 1    | 1    | 9         | 9    | 9    | 3        | 3    | 3    |
|              | R2          | 2                       | 2    | 2    | 5        | 5    | 5    | 1            | 1    | 1    | 1          | 1    | 1    | 9           | 9    | 9    | 3                                  | 3    | 3    | 9                         | 9    | 9    | 5                  | 5    | 5    | 1             | 1    | 1    | 9         | 9    | 9    | 3        | 3    | 3    |
| CoPant 84211 | R1          | 1                       | 1    | 1    | 5        | 5    | 5    | 1            | 1    | 1    | 1          | 1    | 1    | 1           | 1    | 1    | 3                                  | 3    | 3    | 1                         | 1    | 1    | 5                  | 5    | 5    | 1             | 1    | 1    | 9         | 9    | 9    | 5        | 5    | 5    |
|              | R2          | 1                       | 1    | 1    | 5        | 5    | 5    | 1            | 1    | 1    | 1          | 1    | 1    | 1           | 1    | 1    | 3                                  | 3    | 3    | 1                         | 1    | 1    | 5                  | 5    | 5    | 1             | 1    | 1    | 9         | 9    | 9    | 5        | 5    | 5    |
| CoS 514      | R1          | 2                       | 2    | 2    | 5        | 5    | 5    | 3            | 3    | 3    | 1          | 1    | 1    | 1           | 1    | 1    | 3                                  | 3    | 3    | 1                         | 1    | 1    | 3                  | 3    | 3    | 1             | 1    | 1    | 1         | 1    | 1    | 5        | 5    | 5    |
|              | R2          | 2                       | 2    | 2    | 5        | 5    | 5    | 3            | 3    | 3    | 1          | 1    | 1    | 1           | 1    | 1    | 3                                  | 3    | 3    | 1                         | 1    | 1    | 3                  | 3    | 3    | 1             | 1    | 1    | 1         | 1    | 1    | 5        | 5    | 5    |
| CoJ 83       | R1          | 1                       | 1    | 1    | 5        | 5    | 5    | 1            | 1    | 1    | 1          | 1    | 1    | 9           | 9    | 9    | 3                                  | 3    | 3    | 9                         | 9    | 9    | 3                  | 3    | 3    | 1             | 1    | 1    | 9         | 9    | 9    | 5        | 5    | 5    |
|              | R2          | 1                       | 1    | 1    | 5        | 5    | 5    | 1            | 1    | 1    | 1          | 1    | 1    | 9           | 9    | 9    | 3                                  | 3    | 3    | 9                         | 9    | 9    | 3                  | 3    | 3    | 1             | 1    | 1    | 9         | 9    | 9    | 5        | 5    | 5    |
| BO 110       | R1          | 2                       | 2    | 2    | 3        | 3    | 3    | 8            | 8    | 8    | 1          | 1    | 1    | 9           | 9    | 9    | 5                                  | 5    | 5    | 1                         | 1    | 1    | 7                  | 7    | 7    | 2             | 2    | 2    | 9         | 9    | 9    | 5        | 5    | 5    |
|              | R2          | 2                       | 2    | 2    | 3        | 3    | 3    | 8            | 8    | 8    | 1          | 1    | 1    | 9           | 9    | 9    | 5                                  | 5    | 5    | 1                         | 1    | 1    | 7                  | 7    | 7    | 2             | 2    | 2    | 9         | 9    | 9    | 5        | 5    | 5    |
| CoS 88230    | R1          | 1                       | 1    | 1    | 5        | 5    | 5    | 3            | 3    | 3    | 3          | 3    | 3    | 1           | 1    | 1    | 3                                  | 3    | 3    | 9                         | 9    | 9    | 5                  | 5    | 5    | 2             | 2    | 2    | 1         | 1    | 1    | 5        | 5    | 5    |
|              | R2          | 1                       | 1    | 1    | 5        | 5    | 5    | 3            | 3    | 3    | 3          | 3    | 3    | 1           | 1    | 1    | 3                                  | 3    | 3    | 9                         | 9    | 9    | 5                  | 5    | 5    | 2             | 2    | 2    | 1         | 1    | 1    | 5        | 5    | 5    |
| CoS 90269    | R1          | 1                       | 1    | 1    | 5        | 5    | 5    | 1            | 1    | 1    | 3          | 3    | 3    | 1           | 1    | 1    | 3                                  | 3    | 3    | 1                         | 1    | 1    | 3                  | 3    | 3    | 1             | 1    | 1    | 9         | 9    | 9    | 5        | 5    | 5    |
|              | R2          | 1                       | 1    | 1    | 5        | 5    | 5    | 1            | 1    | 1    | 3          | 3    | 3    | 1           | 1    | 1    | 3                                  | 3    | 3    | 1                         | 1    | 1    | 3                  | 3    | 3    | 1             | 1    | 1    | 9         | 9    | 9    | 5        | 5    | 5    |
| CoS 109      | R1          | 2                       | 2    | 2    | 3        | 3    | 3    | 2            | 2    | 2    | 1          | 1    | 1    | 1           | 1    | 1    | 3                                  | 3    | 3    | 1                         | 1    | 1    | 5                  | 5    | 5    | 2             | 2    | 2    | 1         | 1    | 1    | 7        | 7    | 7    |

|            |    |   |   |   |   |   |   |   |   |   |   |   |   |   |   |   |   |   |   |   |   |   |   |   |   |   |   |   |   |   |   |   |   |   |
|------------|----|---|---|---|---|---|---|---|---|---|---|---|---|---|---|---|---|---|---|---|---|---|---|---|---|---|---|---|---|---|---|---|---|---|
| CoSe 01235 | R2 | 2 | 2 | 2 | 3 | 3 | 3 | 2 | 2 | 2 | 1 | 1 | 1 | 1 | 1 | 1 | 3 | 3 | 3 | 1 | 1 | 1 | 5 | 5 | 5 | 2 | 2 | 2 | 1 | 1 | 1 | 7 | 7 | 7 |
|            | R1 | 2 | 2 | 2 | 5 | 5 | 5 | 1 | 1 | 1 | 1 | 1 | 1 | 1 | 1 | 1 | 3 | 3 | 3 | 9 | 9 | 9 | 5 | 5 | 5 | 2 | 2 | 2 | 1 | 1 | 1 | 5 | 5 | 5 |
|            | R2 | 2 | 2 | 2 | 5 | 5 | 5 | 1 | 1 | 1 | 1 | 1 | 1 | 1 | 1 | 1 | 3 | 3 | 3 | 9 | 9 | 9 | 5 | 5 | 5 | 2 | 2 | 2 | 1 | 1 | 1 | 5 | 5 | 5 |
| CoS 770    | R1 | 1 | 1 | 1 | 7 | 7 | 7 | 1 | 1 | 1 | 1 | 1 | 1 | 1 | 1 | 3 | 3 | 3 | 1 | 1 | 1 | 5 | 5 | 5 | 1 | 1 | 1 | 1 | 1 | 1 | 5 | 5 | 5 |   |
|            | R2 | 1 | 1 | 1 | 7 | 7 | 7 | 1 | 1 | 1 | 1 | 1 | 1 | 1 | 1 | 3 | 3 | 3 | 1 | 1 | 1 | 5 | 5 | 5 | 1 | 1 | 1 | 1 | 1 | 1 | 5 | 5 | 5 |   |
| CoSe 98231 | R1 | 1 | 1 | 1 | 5 | 5 | 5 | 2 | 2 | 2 | 1 | 1 | 1 | 1 | 1 | 3 | 3 | 3 | 9 | 9 | 9 | 3 | 3 | 3 | 2 | 2 | 2 | 1 | 1 | 1 | 5 | 5 | 5 |   |
|            | R2 | 1 | 1 | 1 | 5 | 5 | 5 | 2 | 2 | 2 | 1 | 1 | 1 | 1 | 1 | 3 | 3 | 3 | 9 | 9 | 9 | 3 | 3 | 3 | 2 | 2 | 2 | 1 | 1 | 1 | 5 | 5 | 5 |   |
| Co 1148    | R1 | 2 | 2 | 2 | 5 | 5 | 5 | 5 | 5 | 5 | 1 | 1 | 1 | 1 | 1 | 3 | 3 | 3 | 9 | 9 | 9 | 5 | 5 | 5 | 1 | 1 | 1 | 9 | 9 | 9 | 7 | 7 | 7 |   |
|            | R2 | 2 | 2 | 2 | 5 | 5 | 5 | 5 | 5 | 5 | 1 | 1 | 1 | 1 | 1 | 3 | 3 | 3 | 9 | 9 | 9 | 5 | 5 | 5 | 1 | 1 | 1 | 9 | 9 | 9 | 7 | 7 | 7 |   |
| CoLk 94184 | R1 | 3 | 3 | 3 | 5 | 5 | 5 | 1 | 1 | 1 | 1 | 1 | 1 | 9 | 9 | 9 | 1 | 1 | 1 | 1 | 1 | 1 | 7 | 7 | 7 | 1 | 1 | 1 | 9 | 9 | 9 | 5 | 5 | 5 |
|            | R2 | 3 | 3 | 3 | 5 | 5 | 5 | 1 | 1 | 1 | 1 | 1 | 1 | 9 | 9 | 9 | 1 | 1 | 1 | 1 | 1 | 1 | 7 | 7 | 7 | 1 | 1 | 1 | 9 | 9 | 9 | 5 | 5 | 5 |
| BO 120     | R1 | 1 | 1 | 1 | 5 | 5 | 5 | 1 | 1 | 1 | 1 | 1 | 1 | 1 | 1 | 3 | 3 | 3 | 9 | 9 | 9 | 7 | 7 | 7 | 2 | 2 | 2 | 9 | 9 | 9 | 5 | 5 | 5 |   |
|            | R2 | 1 | 1 | 1 | 5 | 5 | 5 | 1 | 1 | 1 | 1 | 1 | 1 | 1 | 1 | 3 | 3 | 3 | 9 | 9 | 9 | 7 | 7 | 7 | 2 | 2 | 2 | 9 | 9 | 9 | 5 | 5 | 5 |   |
| CoS 02258  | R1 | 1 | 1 | 1 | 5 | 5 | 5 | 3 | 3 | 3 | 1 | 1 | 1 | 1 | 1 | 3 | 3 | 3 | 1 | 1 | 1 | 5 | 5 | 5 | 1 | 1 | 1 | 9 | 9 | 9 | 5 | 5 | 5 |   |
|            | R2 | 1 | 1 | 1 | 5 | 5 | 5 | 3 | 3 | 3 | 1 | 1 | 1 | 1 | 1 | 3 | 3 | 3 | 1 | 1 | 1 | 5 | 5 | 5 | 1 | 1 | 1 | 9 | 9 | 9 | 5 | 5 | 5 |   |
| CoB 94164  | R1 | 1 | 1 | 1 | 5 | 5 | 5 | 3 | 3 | 3 | 3 | 3 | 3 | 1 | 1 | 1 | 1 | 1 | 1 | 1 | 1 | 5 | 5 | 5 | 2 | 2 | 2 | 9 | 9 | 9 | 5 | 5 | 5 |   |
|            | R2 | 1 | 1 | 1 | 5 | 5 | 5 | 3 | 3 | 3 | 3 | 3 | 3 | 1 | 1 | 1 | 1 | 1 | 1 | 1 | 1 | 5 | 5 | 5 | 2 | 2 | 2 | 9 | 9 | 9 | 5 | 5 | 5 |   |
| BO 91      | R1 | 1 | 1 | 1 | 5 | 5 | 5 | 1 | 1 | 1 | 3 | 3 | 3 | 9 | 9 | 9 | 3 | 3 | 3 | 1 | 1 | 1 | 5 | 5 | 5 | 1 | 1 | 1 | 1 | 1 | 1 | 5 | 5 | 5 |
|            | R2 | 1 | 1 | 1 | 5 | 5 | 5 | 1 | 1 | 1 | 3 | 3 | 3 | 9 | 9 | 9 | 3 | 3 | 3 | 1 | 1 | 1 | 5 | 5 | 5 | 1 | 1 | 1 | 1 | 1 | 1 | 5 | 5 | 5 |
| CoS 96268  | R1 | 1 | 1 | 1 | 7 | 7 | 7 | 1 | 1 | 1 | 3 | 3 | 3 | 1 | 1 | 1 | 5 | 5 | 5 | 9 | 9 | 9 | 5 | 5 | 5 | 1 | 1 | 1 | 9 | 9 | 9 | 7 | 7 | 7 |
|            | R2 | 1 | 1 | 1 | 7 | 7 | 7 | 1 | 1 | 1 | 3 | 3 | 3 | 1 | 1 | 1 | 5 | 5 | 5 | 9 | 9 | 9 | 5 | 5 | 5 | 1 | 1 | 1 | 9 | 9 | 9 | 7 | 7 | 7 |
| CoS 94257  | R1 | 1 | 1 | 1 | 5 | 5 | 5 | 3 | 3 | 3 | 3 | 3 | 3 | 1 | 1 | 1 | 3 | 3 | 3 | 1 | 1 | 1 | 5 | 5 | 5 | 1 | 1 | 1 | 9 | 9 | 9 | 7 | 7 | 7 |
|            | R2 | 1 | 1 | 1 | 5 | 5 | 5 | 3 | 3 | 3 | 3 | 3 | 3 | 1 | 1 | 1 | 3 | 3 | 3 | 1 | 1 | 1 | 5 | 5 | 5 | 1 | 1 | 1 | 9 | 9 | 9 | 7 | 7 | 7 |
| CoSe 01424 | R1 | 2 | 2 | 2 | 5 | 5 | 5 | 5 | 5 | 5 | 3 | 3 | 3 | 1 | 1 | 1 | 3 | 3 | 3 | 9 | 9 | 9 | 5 | 5 | 5 | 1 | 1 | 1 | 9 | 9 | 9 | 5 | 5 | 5 |
|            | R2 | 2 | 2 | 2 | 5 | 5 | 5 | 5 | 5 | 5 | 3 | 3 | 3 | 1 | 1 | 1 | 3 | 3 | 3 | 9 | 9 | 9 | 5 | 5 | 5 | 1 | 1 | 1 | 9 | 9 | 9 | 5 | 5 | 5 |
| CoH 110    | R1 | 1 | 1 | 1 | 5 | 5 | 5 | 3 | 3 | 3 | 3 | 3 | 3 | 1 | 1 | 1 | 3 | 3 | 3 | 9 | 9 | 9 | 5 | 5 | 5 | 1 | 1 | 1 | 9 | 9 | 9 | 5 | 5 | 5 |
|            | R2 | 1 | 1 | 1 | 5 | 5 | 5 | 3 | 3 | 3 | 3 | 3 | 3 | 1 | 1 | 1 | 3 | 3 | 3 | 9 | 9 | 9 | 5 | 5 | 5 | 1 | 1 | 1 | 9 | 9 | 9 | 5 | 5 | 5 |
| CoS 797    | R1 | 3 | 3 | 3 | 5 | 5 | 5 | 5 | 5 | 5 | 1 | 1 | 1 | 1 | 1 | 3 | 3 | 3 | 1 | 1 | 1 | 3 | 3 | 3 | 2 | 2 | 2 | 1 | 1 | 1 | 3 | 3 | 3 |   |
|            | R2 | 3 | 3 | 3 | 5 | 5 | 5 | 5 | 5 | 5 | 1 | 1 | 1 | 1 | 1 | 3 | 3 | 3 | 1 | 1 | 1 | 3 | 3 | 3 | 2 | 2 | 2 | 1 | 1 | 1 | 3 | 3 | 3 |   |
| CoLk 8102  | R1 | 1 | 1 | 1 | 5 | 5 | 5 | 3 | 3 | 3 | 1 | 1 | 1 | 1 | 1 | 1 | 1 | 1 | 1 | 1 | 1 | 5 | 5 | 5 | 2 | 2 | 2 | 9 | 9 | 9 | 5 | 5 | 5 |   |
|            | R2 | 1 | 1 | 1 | 5 | 5 | 5 | 3 | 3 | 3 | 1 | 1 | 1 | 1 | 1 | 1 | 1 | 1 | 1 | 1 | 1 | 5 | 5 | 5 | 2 | 2 | 2 | 9 | 9 | 9 | 5 | 5 | 5 |   |
| CoS 510    | R1 | 2 | 2 | 2 | 5 | 5 | 5 | 3 | 3 | 3 | 1 | 1 | 1 | 1 | 1 | 3 | 3 | 3 | 9 | 9 | 9 | 3 | 3 | 3 | 2 | 2 | 2 | 9 | 9 | 9 | 3 | 3 | 3 |   |
|            | R2 | 2 | 2 | 2 | 5 | 5 | 5 | 3 | 3 | 3 | 1 | 1 | 1 | 1 | 1 | 3 | 3 | 3 | 9 | 9 | 9 | 3 | 3 | 3 | 2 | 2 | 2 | 9 | 9 | 9 | 3 | 3 | 3 |   |
| CoS 767    | R1 | 3 | 3 | 3 | 3 | 3 | 3 | 8 | 8 | 8 | 1 | 1 | 1 | 1 | 1 | 1 | 1 | 1 | 1 | 1 | 1 | 5 | 5 | 5 | 2 | 2 | 2 | 1 | 1 | 1 | 5 | 5 | 5 |   |
|            | R2 | 3 | 3 | 3 | 3 | 3 | 3 | 8 | 8 | 8 | 1 | 1 | 1 | 1 | 1 | 1 | 1 | 1 | 1 | 1 | 1 | 5 | 5 | 5 | 2 | 2 | 2 | 1 | 1 | 1 | 5 | 5 | 5 |   |
| CoS 541    | R1 | 2 | 2 | 2 | 5 | 5 | 5 | 3 | 3 | 3 | 1 | 1 | 1 | 1 | 1 | 1 | 1 | 1 | 1 | 1 | 1 | 3 | 3 | 3 | 1 | 1 | 1 | 9 | 9 | 9 | 3 | 3 | 3 |   |
|            | R2 | 2 | 2 | 2 | 5 | 5 | 5 | 3 | 3 | 3 | 1 | 1 | 1 | 1 | 1 | 1 | 1 | 1 | 1 | 1 | 1 | 3 | 3 | 3 | 1 | 1 | 1 | 9 | 9 | 9 | 3 | 3 | 3 |   |
| CoS 97258  | R1 | 2 | 2 | 2 | 5 | 5 | 5 | 1 | 1 | 1 | 3 | 3 | 3 | 1 | 1 | 1 | 3 | 3 | 3 | 9 | 9 | 9 | 3 | 3 | 3 | 1 | 1 | 1 | 9 | 9 | 9 | 3 | 3 | 3 |
|            | R2 | 2 | 2 | 2 | 5 | 5 | 5 | 1 | 1 | 1 | 3 | 3 | 3 | 1 | 1 | 1 | 3 | 3 | 3 | 9 | 9 | 9 | 3 | 3 | 3 | 1 | 1 | 1 | 9 | 9 | 9 | 3 | 3 | 3 |
| Co 1158    | R1 | 2 | 2 | 2 | 5 | 5 | 5 | 4 | 4 | 4 | 1 | 1 | 1 | 1 | 1 | 1 | 1 | 1 | 1 | 9 | 9 | 9 | 5 | 5 | 5 | 1 | 1 | 1 | 9 | 9 | 9 | 5 | 5 | 5 |
|            | R2 | 2 | 2 | 2 | 5 | 5 | 5 | 4 | 4 | 4 | 1 | 1 | 1 | 1 | 1 | 1 | 1 | 1 | 1 | 9 | 9 | 9 | 5 | 5 | 5 | 1 | 1 | 1 | 9 | 9 | 9 | 5 | 5 | 5 |

|              |    |   |   |   |   |   |   |   |   |   |   |   |   |   |   |   |   |   |   |   |   |   |   |   |   |   |   |   |   |   |   |   |   |   |
|--------------|----|---|---|---|---|---|---|---|---|---|---|---|---|---|---|---|---|---|---|---|---|---|---|---|---|---|---|---|---|---|---|---|---|---|
| CoP 9302     | R1 | 1 | 1 | 1 | 5 | 5 | 5 | 1 | 1 | 1 | 3 | 3 | 3 | 1 | 1 | 1 | 3 | 3 | 3 | 1 | 1 | 1 | 5 | 5 | 5 | 1 | 1 | 1 | 1 | 1 | 1 | 5 | 5 | 5 |
|              | R2 | 1 | 1 | 1 | 5 | 5 | 5 | 1 | 1 | 1 | 3 | 3 | 3 | 1 | 1 | 1 | 3 | 3 | 3 | 1 | 1 | 1 | 5 | 5 | 5 | 1 | 1 | 1 | 1 | 1 | 1 | 5 | 5 | 5 |
| CoS 8315     | R1 | 1 | 1 | 1 | 5 | 5 | 5 | 3 | 3 | 3 | 3 | 3 | 3 | 1 | 1 | 1 | 3 | 3 | 3 | 1 | 1 | 1 | 3 | 3 | 3 | 1 | 1 | 1 | 9 | 9 | 9 | 5 | 5 | 5 |
|              | R2 | 1 | 1 | 1 | 5 | 5 | 5 | 3 | 3 | 3 | 3 | 3 | 3 | 1 | 1 | 1 | 3 | 3 | 3 | 1 | 1 | 1 | 3 | 3 | 3 | 1 | 1 | 1 | 9 | 9 | 9 | 5 | 5 | 5 |
| CoJ 64       | R1 | 1 | 1 | 1 | 5 | 5 | 5 | 3 | 3 | 3 | 1 | 1 | 1 | 1 | 1 | 1 | 3 | 3 | 3 | 9 | 9 | 9 | 5 | 5 | 5 | 2 | 2 | 2 | 1 | 1 | 1 | 3 | 3 | 3 |
|              | R2 | 1 | 1 | 1 | 5 | 5 | 5 | 3 | 3 | 3 | 1 | 1 | 1 | 1 | 1 | 1 | 3 | 3 | 3 | 9 | 9 | 9 | 5 | 5 | 5 | 2 | 2 | 2 | 1 | 1 | 1 | 3 | 3 | 3 |
| CoS 96258    | R1 | 1 | 1 | 1 | 5 | 5 | 5 | 3 | 3 | 3 | 3 | 3 | 3 | 1 | 1 | 1 | 5 | 5 | 5 | 9 | 9 | 9 | 5 | 5 | 5 | 1 | 1 | 1 | 9 | 9 | 9 | 5 | 5 | 5 |
|              | R2 | 1 | 1 | 1 | 5 | 5 | 5 | 3 | 3 | 3 | 3 | 3 | 3 | 1 | 1 | 1 | 5 | 5 | 5 | 9 | 9 | 9 | 5 | 5 | 5 | 1 | 1 | 1 | 9 | 9 | 9 | 5 | 5 | 5 |
| BO 99        | R1 | 3 | 3 | 3 | 3 | 3 | 3 | 3 | 3 | 3 | 1 | 1 | 1 | 1 | 1 | 1 | 1 | 1 | 1 | 1 | 1 | 1 | 7 | 7 | 7 | 2 | 2 | 2 | 9 | 9 | 9 | 3 | 3 | 3 |
|              | R2 | 3 | 3 | 3 | 3 | 3 | 3 | 3 | 3 | 3 | 1 | 1 | 1 | 1 | 1 | 1 | 1 | 1 | 1 | 1 | 1 | 1 | 7 | 7 | 7 | 2 | 2 | 2 | 9 | 9 | 9 | 3 | 3 | 3 |
| Co 6811      | R1 | 2 | 2 | 2 | 3 | 3 | 3 | 3 | 3 | 3 | 1 | 1 | 1 | 1 | 1 | 1 | 3 | 3 | 3 | 9 | 9 | 9 | 3 | 3 | 3 | 2 | 2 | 2 | 9 | 9 | 9 | 5 | 5 | 5 |
|              | R2 | 2 | 2 | 2 | 3 | 3 | 3 | 3 | 3 | 3 | 1 | 1 | 1 | 1 | 1 | 1 | 3 | 3 | 3 | 9 | 9 | 9 | 3 | 3 | 3 | 2 | 2 | 2 | 9 | 9 | 9 | 5 | 5 | 5 |
| CoLk 8001    | R1 | 1 | 1 | 1 | 5 | 5 | 5 | 1 | 1 | 1 | 3 | 3 | 3 | 1 | 1 | 1 | 3 | 3 | 3 | 1 | 1 | 1 | 5 | 5 | 5 | 1 | 1 | 1 | 9 | 9 | 9 | 5 | 5 | 5 |
|              | R2 | 1 | 1 | 1 | 5 | 5 | 5 | 1 | 1 | 1 | 3 | 3 | 3 | 1 | 1 | 1 | 3 | 3 | 3 | 1 | 1 | 1 | 5 | 5 | 5 | 1 | 1 | 1 | 9 | 9 | 9 | 5 | 5 | 5 |
| CoS 02264    | R1 | 1 | 1 | 1 | 7 | 7 | 7 | 3 | 3 | 3 | 1 | 1 | 1 | 1 | 1 | 1 | 3 | 3 | 3 | 1 | 1 | 1 | 5 | 5 | 5 | 2 | 2 | 2 | 9 | 9 | 9 | 5 | 5 | 5 |
|              | R2 | 1 | 1 | 1 | 7 | 7 | 7 | 3 | 3 | 3 | 1 | 1 | 1 | 1 | 1 | 1 | 3 | 3 | 3 | 1 | 1 | 1 | 5 | 5 | 5 | 2 | 2 | 2 | 9 | 9 | 9 | 5 | 5 | 5 |
| CoPant 90223 | R1 | 1 | 1 | 1 | 5 | 5 | 5 | 3 | 3 | 3 | 3 | 3 | 3 | 1 | 1 | 1 | 1 | 1 | 1 | 9 | 9 | 9 | 5 | 5 | 5 | 1 | 1 | 1 | 9 | 9 | 9 | 5 | 5 | 5 |
|              | R2 | 1 | 1 | 1 | 5 | 5 | 5 | 3 | 3 | 3 | 3 | 3 | 3 | 1 | 1 | 1 | 1 | 1 | 1 | 9 | 9 | 9 | 5 | 5 | 5 | 1 | 1 | 1 | 9 | 9 | 9 | 5 | 5 | 5 |
| CoSe 95422   | R1 | 3 | 3 | 3 | 5 | 5 | 5 | 5 | 5 | 5 | 1 | 1 | 1 | 1 | 1 | 1 | 3 | 3 | 3 | 1 | 1 | 1 | 3 | 3 | 3 | 1 | 1 | 1 | 9 | 9 | 9 | 5 | 5 | 5 |
|              | R2 | 3 | 3 | 3 | 5 | 5 | 5 | 5 | 5 | 5 | 1 | 1 | 1 | 1 | 1 | 1 | 3 | 3 | 3 | 1 | 1 | 1 | 3 | 3 | 3 | 1 | 1 | 1 | 9 | 9 | 9 | 5 | 5 | 5 |
| CoS 8436     | R1 | 1 | 1 | 1 | 5 | 5 | 5 | 4 | 4 | 4 | 1 | 1 | 1 | 1 | 1 | 1 | 1 | 1 | 1 | 1 | 1 | 5 | 5 | 5 | 1 | 1 | 1 | 9 | 9 | 9 | 3 | 3 | 3 |   |
|              | R2 | 1 | 1 | 1 | 5 | 5 | 5 | 4 | 4 | 4 | 1 | 1 | 1 | 1 | 1 | 1 | 1 | 1 | 1 | 1 | 1 | 5 | 5 | 5 | 1 | 1 | 1 | 9 | 9 | 9 | 3 | 3 | 3 |   |
| UP 9530      | R1 | 2 | 2 | 2 | 5 | 5 | 5 | 6 | 6 | 6 | 1 | 1 | 1 | 1 | 1 | 1 | 1 | 1 | 1 | 1 | 1 | 7 | 7 | 7 | 1 | 1 | 1 | 1 | 1 | 1 | 5 | 5 | 5 |   |
|              | R2 | 2 | 2 | 2 | 5 | 5 | 5 | 6 | 6 | 6 | 1 | 1 | 1 | 1 | 1 | 1 | 1 | 1 | 1 | 1 | 1 | 7 | 7 | 7 | 1 | 1 | 1 | 1 | 1 | 1 | 5 | 5 | 5 |   |
| Co 87263     | R1 | 4 | 4 | 4 | 5 | 5 | 5 | 1 | 1 | 1 | 3 | 3 | 3 | 1 | 1 | 1 | 3 | 3 | 3 | 9 | 9 | 9 | 5 | 5 | 5 | 2 | 2 | 2 | 9 | 9 | 9 | 7 | 7 | 7 |
|              | R2 | 4 | 4 | 4 | 5 | 5 | 5 | 1 | 1 | 1 | 3 | 3 | 3 | 1 | 1 | 1 | 3 | 3 | 3 | 9 | 9 | 9 | 5 | 5 | 5 | 2 | 2 | 2 | 9 | 9 | 9 | 7 | 7 | 7 |
| BO 136       | R1 | 2 | 2 | 2 | 5 | 5 | 5 | 6 | 6 | 6 | 1 | 1 | 1 | 1 | 1 | 1 | 1 | 1 | 1 | 1 | 1 | 7 | 7 | 7 | 1 | 1 | 1 | 9 | 9 | 9 | 5 | 5 | 5 |   |
|              | R2 | 2 | 2 | 2 | 5 | 5 | 5 | 6 | 6 | 6 | 1 | 1 | 1 | 1 | 1 | 1 | 1 | 1 | 1 | 1 | 1 | 7 | 7 | 7 | 1 | 1 | 1 | 9 | 9 | 9 | 5 | 5 | 5 |   |
| Co 89003     | R1 | 2 | 2 | 2 | 5 | 5 | 5 | 3 | 3 | 3 | 1 | 1 | 1 | 1 | 1 | 1 | 1 | 1 | 1 | 1 | 1 | 5 | 5 | 5 | 1 | 1 | 1 | 1 | 1 | 1 | 5 | 5 | 5 |   |
|              | R2 | 2 | 2 | 2 | 5 | 5 | 5 | 3 | 3 | 3 | 1 | 1 | 1 | 1 | 1 | 1 | 1 | 1 | 1 | 1 | 1 | 5 | 5 | 5 | 1 | 1 | 1 | 1 | 1 | 1 | 5 | 5 | 5 |   |
| CoJ 85       | R1 | 2 | 2 | 2 | 3 | 3 | 3 | 3 | 3 | 3 | 3 | 3 | 3 | 1 | 1 | 1 | 3 | 3 | 3 | 1 | 1 | 1 | 5 | 5 | 5 | 1 | 1 | 1 | 9 | 9 | 9 | 5 | 5 | 5 |
|              | R2 | 2 | 2 | 2 | 3 | 3 | 3 | 3 | 3 | 3 | 3 | 3 | 3 | 1 | 1 | 1 | 3 | 3 | 3 | 1 | 1 | 1 | 5 | 5 | 5 | 1 | 1 | 1 | 9 | 9 | 9 | 5 | 5 | 5 |
| CoS 91230    | R1 | 1 | 1 | 1 | 5 | 5 | 5 | 4 | 4 | 4 | 1 | 1 | 1 | 1 | 1 | 1 | 1 | 1 | 1 | 1 | 1 | 5 | 5 | 5 | 1 | 1 | 1 | 1 | 1 | 1 | 5 | 5 | 5 |   |
|              | R2 | 1 | 1 | 1 | 5 | 5 | 5 | 4 | 4 | 4 | 1 | 1 | 1 | 1 | 1 | 1 | 1 | 1 | 1 | 1 | 1 | 5 | 5 | 5 | 1 | 1 | 1 | 1 | 1 | 1 | 5 | 5 | 5 |   |
| BO 130       | R1 | 2 | 2 | 2 | 3 | 3 | 3 | 3 | 3 | 3 | 1 | 1 | 1 | 1 | 1 | 1 | 3 | 3 | 3 | 9 | 9 | 9 | 5 | 5 | 5 | 2 | 2 | 2 | 9 | 9 | 9 | 5 | 5 | 5 |
|              | R2 | 2 | 2 | 2 | 3 | 3 | 3 | 3 | 3 | 3 | 1 | 1 | 1 | 1 | 1 | 1 | 3 | 3 | 3 | 9 | 9 | 9 | 5 | 5 | 5 | 2 | 2 | 2 | 9 | 9 | 9 | 5 | 5 | 5 |
| BO 138       | R1 | 1 | 1 | 1 | 5 | 5 | 5 | 1 | 1 | 1 | 1 | 1 | 1 | 1 | 1 | 1 | 3 | 3 | 3 | 1 | 1 | 1 | 5 | 5 | 5 | 1 | 1 | 1 | 9 | 9 | 9 | 5 | 5 | 5 |
|              | R2 | 1 | 1 | 1 | 5 | 5 | 5 | 1 | 1 | 1 | 1 | 1 | 1 | 1 | 1 | 1 | 3 | 3 | 3 | 1 | 1 | 1 | 5 | 5 | 5 | 1 | 1 | 1 | 9 | 9 | 9 | 5 | 5 | 5 |
| CoS 443      | R1 | 1 | 1 | 1 | 5 | 5 | 5 | 4 | 4 | 4 | 1 | 1 | 1 | 1 | 1 | 1 | 1 | 1 | 1 | 1 | 1 | 5 | 5 | 5 | 2 | 2 | 2 | 1 | 1 | 1 | 3 | 3 | 3 |   |
|              | R2 | 1 | 1 | 1 | 5 | 5 | 5 | 4 | 4 | 4 | 1 | 1 | 1 | 1 | 1 | 1 | 1 | 1 | 1 | 1 | 1 | 5 | 5 | 5 | 2 | 2 | 2 | 1 | 1 | 1 | 3 | 3 | 3 |   |
| BO 109       | R1 | 1 | 1 | 1 | 3 | 3 | 3 | 1 | 1 | 1 | 3 | 3 | 3 | 1 | 1 | 1 | 3 | 3 | 3 | 9 | 9 | 9 | 5 | 5 | 5 | 2 | 2 | 2 | 9 | 9 | 9 | 5 | 5 | 5 |



|              |    |   |   |   |   |   |   |   |   |   |   |   |   |   |   |   |   |   |   |   |   |   |   |   |   |   |   |   |   |   |   |   |   |   |   |
|--------------|----|---|---|---|---|---|---|---|---|---|---|---|---|---|---|---|---|---|---|---|---|---|---|---|---|---|---|---|---|---|---|---|---|---|---|
| BO 129       | R2 | 1 | 1 | 1 | 3 | 3 | 3 | 1 | 1 | 1 | 3 | 3 | 3 | 1 | 1 | 1 | 3 | 3 | 3 | 9 | 9 | 9 | 5 | 5 | 5 | 2 | 2 | 2 | 9 | 9 | 9 | 5 | 5 | 5 |   |
|              | R1 | 1 | 1 | 1 | 5 | 5 | 5 | 5 | 5 | 5 | 1 | 1 | 1 | 1 | 1 | 1 | 3 | 3 | 3 | 1 | 1 | 1 | 5 | 5 | 5 | 2 | 2 | 2 | 1 | 1 | 1 | 5 | 5 | 5 |   |
|              | R2 | 1 | 1 | 1 | 5 | 5 | 5 | 5 | 5 | 5 | 1 | 1 | 1 | 1 | 1 | 1 | 3 | 3 | 3 | 1 | 1 | 1 | 5 | 5 | 5 | 2 | 2 | 2 | 1 | 1 | 1 | 5 | 5 | 5 |   |
| Co 6425      | R1 | 1 | 1 | 1 | 3 | 3 | 3 | 4 | 4 | 4 | 1 | 1 | 1 | 1 | 1 | 1 | 1 | 1 | 9 | 9 | 9 | 5 | 5 | 5 | 1 | 1 | 1 | 9 | 9 | 9 | 3 | 3 | 3 |   |   |
|              | R2 | 1 | 1 | 1 | 3 | 3 | 3 | 4 | 4 | 4 | 1 | 1 | 1 | 1 | 1 | 1 | 1 | 1 | 9 | 9 | 9 | 5 | 5 | 5 | 1 | 1 | 1 | 9 | 9 | 9 | 3 | 3 | 3 |   |   |
| Co 1336      | R1 | 1 | 1 | 1 | 3 | 3 | 3 | 3 | 3 | 3 | 1 | 1 | 1 | 1 | 1 | 1 | 3 | 3 | 3 | 9 | 9 | 9 | 5 | 5 | 5 | 1 | 1 | 1 | 9 | 9 | 9 | 5 | 5 | 5 |   |
|              | R2 | 1 | 1 | 1 | 3 | 3 | 3 | 3 | 3 | 3 | 1 | 1 | 1 | 1 | 1 | 1 | 3 | 3 | 3 | 9 | 9 | 9 | 5 | 5 | 5 | 1 | 1 | 1 | 9 | 9 | 9 | 5 | 5 | 5 |   |
| CoP 9702     | R1 | 1 | 1 | 1 | 5 | 5 | 5 | 1 | 1 | 1 | 3 | 3 | 3 | 1 | 1 | 1 | 3 | 3 | 3 | 1 | 1 | 1 | 5 | 5 | 5 | 1 | 1 | 1 | 1 | 1 | 1 | 5 | 5 | 5 |   |
|              | R2 | 1 | 1 | 1 | 5 | 5 | 5 | 1 | 1 | 1 | 3 | 3 | 3 | 1 | 1 | 1 | 3 | 3 | 3 | 1 | 1 | 1 | 5 | 5 | 5 | 1 | 1 | 1 | 1 | 1 | 1 | 5 | 5 | 5 |   |
| CoP 9301     | R1 | 2 | 2 | 2 | 5 | 5 | 5 | 3 | 3 | 3 | 1 | 1 | 1 | 1 | 1 | 1 | 3 | 3 | 3 | 9 | 9 | 9 | 7 | 7 | 7 | 2 | 2 | 2 | 9 | 9 | 9 | 5 | 5 | 5 |   |
|              | R2 | 2 | 2 | 2 | 5 | 5 | 5 | 3 | 3 | 3 | 1 | 1 | 1 | 1 | 1 | 1 | 3 | 3 | 3 | 9 | 9 | 9 | 7 | 7 | 7 | 2 | 2 | 2 | 9 | 9 | 9 | 5 | 5 | 5 |   |
| Co 89029     | R1 | 1 | 1 | 1 | 7 | 7 | 7 | 8 | 8 | 8 | 5 | 5 | 5 | 1 | 1 | 1 | 3 | 3 | 3 | 9 | 9 | 9 | 5 | 5 | 5 | 2 | 2 | 2 | 9 | 9 | 9 | 5 | 5 | 5 |   |
|              | R2 | 1 | 1 | 1 | 7 | 7 | 7 | 8 | 8 | 8 | 5 | 5 | 5 | 1 | 1 | 1 | 3 | 3 | 3 | 9 | 9 | 9 | 5 | 5 | 5 | 2 | 2 | 2 | 9 | 9 | 9 | 5 | 5 | 5 |   |
| CoS 8432     | R1 | 1 | 1 | 1 | 5 | 5 | 5 | 3 | 3 | 3 | 1 | 1 | 1 | 1 | 1 | 1 | 3 | 3 | 3 | 1 | 1 | 1 | 5 | 5 | 5 | 1 | 1 | 1 | 9 | 9 | 9 | 5 | 5 | 5 |   |
|              | R2 | 1 | 1 | 1 | 5 | 5 | 5 | 3 | 3 | 3 | 1 | 1 | 1 | 1 | 1 | 1 | 3 | 3 | 3 | 1 | 1 | 1 | 5 | 5 | 5 | 1 | 1 | 1 | 9 | 9 | 9 | 5 | 5 | 5 |   |
| CoH 35       | R1 | 1 | 1 | 1 | 5 | 5 | 5 | 1 | 1 | 1 | 3 | 3 | 3 | 1 | 1 | 1 | 3 | 3 | 3 | 1 | 1 | 1 | 5 | 5 | 5 | 1 | 1 | 1 | 9 | 9 | 9 | 5 | 5 | 5 |   |
|              | R2 | 1 | 1 | 1 | 5 | 5 | 5 | 1 | 1 | 1 | 3 | 3 | 3 | 1 | 1 | 1 | 3 | 3 | 3 | 1 | 1 | 1 | 5 | 5 | 5 | 1 | 1 | 1 | 9 | 9 | 9 | 5 | 5 | 5 |   |
| CoPant 84212 | R1 | 1 | 1 | 1 | 5 | 5 | 5 | 3 | 3 | 3 | 3 | 3 | 3 | 1 | 1 | 1 | 3 | 3 | 3 | 9 | 9 | 9 | 5 | 5 | 5 | 2 | 2 | 2 | 1 | 1 | 1 | 7 | 7 | 7 |   |
|              | R2 | 1 | 1 | 1 | 5 | 5 | 5 | 3 | 3 | 3 | 3 | 3 | 3 | 1 | 1 | 1 | 3 | 3 | 3 | 9 | 9 | 9 | 5 | 5 | 5 | 2 | 2 | 2 | 1 | 1 | 1 | 7 | 7 | 7 |   |
| CoJ 88       | R1 | 1 | 1 | 1 | 3 | 3 | 3 | 3 | 3 | 3 | 3 | 3 | 3 | 9 | 9 | 9 | 1 | 1 | 1 | 9 | 9 | 9 | 5 | 5 | 5 | 1 | 1 | 1 | 1 | 1 | 1 | 5 | 5 | 5 |   |
|              | R2 | 1 | 1 | 1 | 3 | 3 | 3 | 3 | 3 | 3 | 3 | 3 | 3 | 9 | 9 | 9 | 1 | 1 | 1 | 9 | 9 | 9 | 5 | 5 | 5 | 1 | 1 | 1 | 1 | 1 | 1 | 5 | 5 | 5 |   |
| CoS 245      | R1 | 1 | 1 | 1 | 5 | 5 | 5 | 1 | 1 | 1 | 5 | 5 | 5 | 1 | 1 | 1 | 3 | 3 | 3 | 9 | 9 | 9 | 5 | 5 | 5 | 2 | 2 | 2 | 1 | 1 | 1 | 5 | 5 | 5 |   |
|              | R2 | 1 | 1 | 1 | 5 | 5 | 5 | 1 | 1 | 1 | 5 | 5 | 5 | 1 | 1 | 1 | 3 | 3 | 3 | 9 | 9 | 9 | 5 | 5 | 5 | 2 | 2 | 2 | 1 | 1 | 1 | 5 | 5 | 5 |   |
| CoS 90265    | R1 | 1 | 1 | 1 | 7 | 7 | 7 | 3 | 3 | 3 | 1 | 1 | 1 | 1 | 1 | 1 | 3 | 3 | 3 | 9 | 9 | 9 | 5 | 5 | 5 | 2 | 2 | 2 | 1 | 1 | 1 | 5 | 5 | 5 |   |
|              | R2 | 1 | 1 | 1 | 7 | 7 | 7 | 3 | 3 | 3 | 1 | 1 | 1 | 1 | 1 | 1 | 3 | 3 | 3 | 9 | 9 | 9 | 5 | 5 | 5 | 2 | 2 | 2 | 1 | 1 | 1 | 5 | 5 | 5 |   |
| BO 137       | R1 | 1 | 1 | 1 | 3 | 3 | 3 | 3 | 3 | 3 | 1 | 1 | 1 | 1 | 1 | 1 | 1 | 1 | 1 | 1 | 1 | 5 | 5 | 5 | 2 | 2 | 2 | 9 | 9 | 9 | 3 | 3 | 3 |   |   |
|              | R2 | 1 | 1 | 1 | 3 | 3 | 3 | 3 | 3 | 3 | 1 | 1 | 1 | 1 | 1 | 1 | 1 | 1 | 1 | 1 | 1 | 5 | 5 | 5 | 2 | 2 | 2 | 9 | 9 | 9 | 3 | 3 | 3 |   |   |
| CoS 95222    | R1 | 3 | 3 | 3 | 5 | 5 | 5 | 5 | 5 | 5 | 3 | 3 | 3 | 1 | 1 | 1 | 3 | 3 | 3 | 1 | 1 | 1 | 3 | 3 | 3 | 2 | 2 | 2 | 9 | 9 | 9 | 5 | 5 | 5 |   |
|              | R2 | 3 | 3 | 3 | 5 | 5 | 5 | 5 | 5 | 5 | 3 | 3 | 3 | 1 | 1 | 1 | 3 | 3 | 3 | 1 | 1 | 1 | 3 | 3 | 3 | 2 | 2 | 2 | 9 | 9 | 9 | 5 | 5 | 5 |   |
| CoS 95270    | R1 | 1 | 1 | 1 | 5 | 5 | 5 | 3 | 3 | 3 | 1 | 1 | 1 | 1 | 1 | 1 | 1 | 1 | 1 | 1 | 1 | 7 | 7 | 7 | 1 | 1 | 1 | 9 | 9 | 9 | 3 | 3 | 3 |   |   |
|              | R2 | 1 | 1 | 1 | 5 | 5 | 5 | 3 | 3 | 3 | 1 | 1 | 1 | 1 | 1 | 1 | 1 | 1 | 1 | 1 | 1 | 7 | 7 | 7 | 1 | 1 | 1 | 9 | 9 | 9 | 3 | 3 | 3 |   |   |
| Co 419       | R1 | 4 | 4 | 4 | 7 | 7 | 7 | 1 | 1 | 1 | 3 | 3 | 3 | 9 | 9 | 9 | 3 | 3 | 3 | 1 | 1 | 1 | 5 | 5 | 5 | 2 | 2 | 2 | 9 | 9 | 9 | 5 | 5 | 5 |   |
|              | R2 | 4 | 4 | 4 | 7 | 7 | 7 | 1 | 1 | 1 | 3 | 3 | 3 | 9 | 9 | 9 | 3 | 3 | 3 | 1 | 1 | 1 | 5 | 5 | 5 | 2 | 2 | 2 | 9 | 9 | 9 | 5 | 5 | 5 |   |
| CoP 9206     | R1 | 1 | 1 | 1 | 5 | 5 | 5 | 3 | 3 | 3 | 3 | 3 | 3 | 1 | 1 | 1 | 1 | 1 | 1 | 9 | 9 | 9 | 7 | 7 | 7 | 2 | 2 | 2 | 1 | 1 | 1 | 3 | 3 | 3 |   |
|              | R2 | 1 | 1 | 1 | 5 | 5 | 5 | 3 | 3 | 3 | 3 | 3 | 3 | 1 | 1 | 1 | 1 | 1 | 1 | 9 | 9 | 9 | 7 | 7 | 7 | 2 | 2 | 2 | 1 | 1 | 1 | 3 | 3 | 3 |   |
| CoH 56       | R1 | 1 | 1 | 1 | 5 | 5 | 5 | 3 | 3 | 3 | 1 | 1 | 1 | 1 | 1 | 1 | 1 | 1 | 1 | 1 | 1 | 5 | 5 | 5 | 1 | 1 | 1 | 9 | 9 | 9 | 3 | 3 | 3 |   |   |
|              | R2 | 1 | 1 | 1 | 5 | 5 | 5 | 3 | 3 | 3 | 1 | 1 | 1 | 1 | 1 | 1 | 1 | 1 | 1 | 1 | 1 | 5 | 5 | 5 | 1 | 1 | 1 | 9 | 9 | 9 | 3 | 3 | 3 |   |   |
| CoH 99       | R1 | 1 | 1 | 1 | 5 | 5 | 5 | 1 | 1 | 1 | 1 | 1 | 1 | 1 | 9 | 9 | 9 | 3 | 3 | 3 | 9 | 9 | 9 | 5 | 5 | 5 | 1 | 1 | 1 | 1 | 1 | 1 | 5 | 5 | 5 |
|              | R2 | 1 | 1 | 1 | 5 | 5 | 5 | 1 | 1 | 1 | 1 | 1 | 1 | 1 | 9 | 9 | 9 | 3 | 3 | 3 | 9 | 9 | 9 | 5 | 5 | 5 | 1 | 1 | 1 | 1 | 1 | 1 | 5 | 5 | 5 |
| CoPant 97222 | R1 | 2 | 2 | 2 | 5 | 5 | 5 | 3 | 3 | 3 | 3 | 3 | 3 | 1 | 1 | 1 | 3 | 3 | 3 | 1 | 1 | 1 | 5 | 5 | 5 | 1 | 1 | 1 | 9 | 9 | 9 | 3 | 3 | 3 |   |
|              | R2 | 2 | 2 | 2 | 5 | 5 | 5 | 3 | 3 | 3 | 3 | 3 | 3 | 1 | 1 | 1 | 3 | 3 | 3 | 1 | 1 | 1 | 5 | 5 | 5 | 1 | 1 | 1 | 9 | 9 | 9 | 3 | 3 | 3 |   |

|            |    |   |   |   |   |   |   |   |   |   |   |   |   |   |   |   |   |   |   |   |   |   |   |   |   |   |   |   |   |   |   |   |   |   |
|------------|----|---|---|---|---|---|---|---|---|---|---|---|---|---|---|---|---|---|---|---|---|---|---|---|---|---|---|---|---|---|---|---|---|---|
| CoS 687    | R1 | 2 | 2 | 2 | 3 | 3 | 3 | 1 | 1 | 1 | 3 | 3 | 3 | 1 | 1 | 1 | 5 | 5 | 5 | 1 | 1 | 1 | 3 | 3 | 3 | 1 | 1 | 1 | 9 | 9 | 9 | 5 | 5 | 5 |
|            | R2 | 2 | 2 | 2 | 3 | 3 | 3 | 1 | 1 | 1 | 3 | 3 | 3 | 1 | 1 | 1 | 5 | 5 | 5 | 1 | 1 | 1 | 3 | 3 | 3 | 1 | 1 | 1 | 9 | 9 | 9 | 5 | 5 | 5 |
| CoS 91269  | R1 | 1 | 1 | 1 | 5 | 5 | 5 | 3 | 3 | 3 | 1 | 1 | 1 | 1 | 1 | 1 | 3 | 3 | 3 | 9 | 9 | 9 | 5 | 5 | 5 | 1 | 1 | 1 | 1 | 1 | 1 | 5 | 5 | 5 |
|            | R2 | 1 | 1 | 1 | 5 | 5 | 5 | 3 | 3 | 3 | 1 | 1 | 1 | 1 | 1 | 1 | 3 | 3 | 3 | 9 | 9 | 9 | 5 | 5 | 5 | 1 | 1 | 1 | 1 | 1 | 1 | 5 | 5 | 5 |
| CoS 8207   | R1 | 1 | 1 | 1 | 3 | 3 | 3 | 4 | 4 | 4 | 1 | 1 | 1 | 1 | 1 | 1 | 1 | 1 | 1 | 1 | 1 | 1 | 5 | 5 | 5 | 1 | 1 | 1 | 9 | 9 | 9 | 3 | 3 | 3 |
|            | R2 | 1 | 1 | 1 | 3 | 3 | 3 | 4 | 4 | 4 | 1 | 1 | 1 | 1 | 1 | 1 | 1 | 1 | 1 | 1 | 1 | 1 | 5 | 5 | 5 | 1 | 1 | 1 | 9 | 9 | 9 | 3 | 3 | 3 |
| CoS 01256  | R1 | 1 | 1 | 1 | 5 | 5 | 5 | 6 | 6 | 6 | 1 | 1 | 1 | 9 | 9 | 9 | 3 | 3 | 3 | 9 | 9 | 9 | 5 | 5 | 5 | 1 | 1 | 1 | 1 | 1 | 1 | 5 | 5 | 5 |
|            | R2 | 1 | 1 | 1 | 5 | 5 | 5 | 6 | 6 | 6 | 1 | 1 | 1 | 9 | 9 | 9 | 3 | 3 | 3 | 9 | 9 | 9 | 5 | 5 | 5 | 1 | 1 | 1 | 1 | 1 | 1 | 5 | 5 | 5 |
| CoS 94270  | R1 | 1 | 1 | 1 | 7 | 7 | 7 | 4 | 4 | 4 | 3 | 3 | 3 | 1 | 1 | 1 | 1 | 1 | 1 | 1 | 1 | 1 | 5 | 5 | 5 | 2 | 2 | 2 | 9 | 9 | 9 | 3 | 3 | 3 |
|            | R2 | 1 | 1 | 1 | 7 | 7 | 7 | 4 | 4 | 4 | 3 | 3 | 3 | 1 | 1 | 1 | 1 | 1 | 1 | 1 | 1 | 1 | 5 | 5 | 5 | 2 | 2 | 2 | 9 | 9 | 9 | 3 | 3 | 3 |
| CoS 96269  | R1 | 1 | 1 | 1 | 5 | 5 | 5 | 3 | 3 | 3 | 3 | 3 | 3 | 1 | 1 | 1 | 3 | 3 | 3 | 1 | 1 | 1 | 5 | 5 | 5 | 2 | 2 | 2 | 9 | 9 | 9 | 5 | 5 | 5 |
|            | R2 | 1 | 1 | 1 | 5 | 5 | 5 | 3 | 3 | 3 | 3 | 3 | 3 | 1 | 1 | 1 | 3 | 3 | 3 | 1 | 1 | 1 | 5 | 5 | 5 | 2 | 2 | 2 | 9 | 9 | 9 | 5 | 5 | 5 |
| CoS 96275  | R1 | 1 | 1 | 1 | 5 | 5 | 5 | 3 | 3 | 3 | 3 | 3 | 3 | 1 | 1 | 1 | 3 | 3 | 3 | 1 | 1 | 1 | 5 | 5 | 5 | 2 | 2 | 2 | 1 | 1 | 1 | 5 | 5 | 5 |
|            | R2 | 1 | 1 | 1 | 5 | 5 | 5 | 3 | 3 | 3 | 3 | 3 | 3 | 1 | 1 | 1 | 3 | 3 | 3 | 1 | 1 | 1 | 5 | 5 | 5 | 2 | 2 | 2 | 1 | 1 | 1 | 5 | 5 | 5 |
| CoS 99259  | R1 | 1 | 1 | 1 | 5 | 5 | 5 | 1 | 1 | 1 | 1 | 1 | 1 | 1 | 1 | 1 | 1 | 1 | 1 | 1 | 1 | 1 | 3 | 3 | 3 | 1 | 1 | 1 | 9 | 9 | 9 | 5 | 5 | 5 |
|            | R2 | 1 | 1 | 1 | 5 | 5 | 5 | 1 | 1 | 1 | 1 | 1 | 1 | 1 | 1 | 1 | 1 | 1 | 1 | 1 | 1 | 1 | 3 | 3 | 3 | 1 | 1 | 1 | 9 | 9 | 9 | 5 | 5 | 5 |
| CoSe 00235 | R1 | 1 | 1 | 1 | 5 | 5 | 5 | 1 | 1 | 1 | 1 | 1 | 1 | 1 | 1 | 1 | 3 | 3 | 3 | 9 | 9 | 9 | 3 | 3 | 3 | 2 | 2 | 2 | 1 | 1 | 1 | 3 | 3 | 3 |
|            | R2 | 1 | 1 | 1 | 5 | 5 | 5 | 1 | 1 | 1 | 1 | 1 | 1 | 1 | 1 | 1 | 3 | 3 | 3 | 9 | 9 | 9 | 3 | 3 | 3 | 2 | 2 | 2 | 1 | 1 | 1 | 3 | 3 | 3 |
| UP 0097    | R1 | 1 | 1 | 1 | 5 | 5 | 5 | 3 | 3 | 3 | 1 | 1 | 1 | 9 | 9 | 9 | 1 | 1 | 1 | 1 | 1 | 1 | 5 | 5 | 5 | 1 | 1 | 1 | 9 | 9 | 9 | 3 | 3 | 3 |
|            | R2 | 1 | 1 | 1 | 5 | 5 | 5 | 3 | 3 | 3 | 1 | 1 | 1 | 9 | 9 | 9 | 1 | 1 | 1 | 1 | 1 | 1 | 5 | 5 | 5 | 1 | 1 | 1 | 9 | 9 | 9 | 3 | 3 | 3 |
| UP 05      | R1 | 1 | 1 | 1 | 5 | 5 | 5 | 1 | 1 | 1 | 3 | 3 | 3 | 1 | 1 | 1 | 3 | 3 | 3 | 9 | 9 | 9 | 5 | 5 | 5 | 1 | 1 | 1 | 9 | 9 | 9 | 5 | 5 | 5 |
|            | R2 | 1 | 1 | 1 | 5 | 5 | 5 | 1 | 1 | 1 | 3 | 3 | 3 | 1 | 1 | 1 | 3 | 3 | 3 | 9 | 9 | 9 | 5 | 5 | 5 | 1 | 1 | 1 | 9 | 9 | 9 | 5 | 5 | 5 |
| CoS 97261  | R1 | 3 | 3 | 3 | 5 | 5 | 5 | 1 | 1 | 1 | 1 | 1 | 1 | 1 | 1 | 1 | 3 | 3 | 3 | 1 | 1 | 1 | 5 | 5 | 5 | 2 | 2 | 2 | 9 | 9 | 9 | 5 | 5 | 5 |
|            | R2 | 3 | 3 | 3 | 5 | 5 | 5 | 1 | 1 | 1 | 1 | 1 | 1 | 1 | 1 | 1 | 3 | 3 | 3 | 1 | 1 | 1 | 5 | 5 | 5 | 2 | 2 | 2 | 9 | 9 | 9 | 5 | 5 | 5 |
